# Supplementary material for: Drivers and strategies for avoiding overuse. A cross-sectional study to explore the experience of Spanish primary care providers handling uncertainty and patients’ requests
Source: PubMed Central journal article supplement — BMJ Open. 2018 Jun 15;8(6):e021339. doi: 10.1136/bmjopen-2017-021339 (PMC6009548; doi:10.1136/bmjopen-2017-021339), 2018-06-15
Supplement: bmjopen-2017-021339.draft_revisions.pdf [file bmjopen-2017-021339.draft_revisions.pdf]

# BMJ Open

BMJ Open is committed to open peer review. As part of this commitment we make the peer review history of every article we publish publicly available.

When an article is published we post the peer reviewers' comments and the authors' responses online. We also post the versions of the paper that were used during peer review. These are the versions that the peer review comments apply to.

The versions of the paper that follow are the versions that were submitted during the peer review process. They are not the versions of record or the final published versions. They should not be cited or distributed as the published version of this manuscript.

BMJ Open is an open access journal and the full, final, typeset and author-corrected version of record of the manuscript is available on our site with no access controls, subscription charges or pay-per-view fees (<http://bmjopen.bmj.com>).

If you have any questions on BMJ Open's open peer review process please email [info.bmjopen@bmj.com](mailto:info.bmjopen@bmj.com)

# BMJ Open

## Drivers and strategies to avoid overuse. The experience of Spanish primary-care-providers handling uncertainty and patients' request

|                               |                                                                                                                                                                                                                                                                                                                                                                                                                                                                                                                                                                                                                                                                                                                                                                                                                                                             |
|-------------------------------|-------------------------------------------------------------------------------------------------------------------------------------------------------------------------------------------------------------------------------------------------------------------------------------------------------------------------------------------------------------------------------------------------------------------------------------------------------------------------------------------------------------------------------------------------------------------------------------------------------------------------------------------------------------------------------------------------------------------------------------------------------------------------------------------------------------------------------------------------------------|
| Journal:                      | <i>BMJ Open</i>                                                                                                                                                                                                                                                                                                                                                                                                                                                                                                                                                                                                                                                                                                                                                                                                                                             |
| Manuscript ID                 | bmjopen-2017-021339                                                                                                                                                                                                                                                                                                                                                                                                                                                                                                                                                                                                                                                                                                                                                                                                                                         |
| Article Type:                 | Research                                                                                                                                                                                                                                                                                                                                                                                                                                                                                                                                                                                                                                                                                                                                                                                                                                                    |
| Date Submitted by the Author: | 21-Dec-2017                                                                                                                                                                                                                                                                                                                                                                                                                                                                                                                                                                                                                                                                                                                                                                                                                                                 |
| Complete List of Authors:     | Mira, José ; Universidad Miguel Hernández de Elche, Health Psychology; Salud Alicante-Sant Joan Health District, Carrillo, Irene; Universidad Miguel Hernández de Elche, Health Psychology Silvestre, Carmen; Servicio Navarro de Salud - Osasunbidea, Servicio de Efectividad y Seguridad Asistencial Pérez Pérez, Pastora; Agencia de Calidad Sanitaria de Andalucía, Patient Safety Observatory Nebot, Cristina; Generalitat Valenciana Conselleria de Sanitat, Dr. Peset Health District Olivera, Guadalupe; Comunidad de Madrid Servicio Madrilenio de Salud, Hospital Clínico San Carlos Gonzalez de Dios, Javier; Hospital General Universitari d'Alacant, Pediatric Department ARANAZ ANDRÉS , JESÚS MARIA; Hospital Universitario Ramon y Cajal, PREVENTIVE MEDICINE AND PUBLIC HEALTH; IRYCIS, INSTITUTO RAMÓN Y CAJAL DE INVESTIGACIÓN SANITARIA |
| Keywords:                     | Quality in health care < HEALTH SERVICES ADMINISTRATION & MANAGEMENT, PRIMARY CARE, Health & safety < HEALTH SERVICES ADMINISTRATION & MANAGEMENT                                                                                                                                                                                                                                                                                                                                                                                                                                                                                                                                                                                                                                                                                                           |
|                               |                                                                                                                                                                                                                                                                                                                                                                                                                                                                                                                                                                                                                                                                                                                                                                                                                                                             |

SCHOLARONE™  
Manuscripts

1  
2  
3 **Drivers and strategies to avoid overuse. The experience of Spanish primary-care-providers**  
4 **handling uncertainty and patients' request**

5  
6 José Joaquín Mira<sup>1,2,3</sup>, Irene Carrillo<sup>2</sup>, Carmen Silvestre<sup>4</sup>, Pastora Pérez-Pérez<sup>5</sup>, Cristina Nebot<sup>6</sup>,  
7 Guadalupe Olivera<sup>7</sup>, Javier González de Dios<sup>8,9</sup>, Jesús M. Aranz-Andrés<sup>10,11,12</sup>  
8  
9

10 <sup>1</sup>Salud Alicante-Sant Joan Health District. Alicante, Spain

11 <sup>2</sup>Health Psychology Department, Universidad Miguel Hernández de Elche. Elche, Spain

12 <sup>3</sup>REDISEC, Red de Servicios de Salud Orientados a Enfermedades Crónicas

13 <sup>4</sup>Servicio de Efectividad y Seguridad Asistencial, Navarre Health Service - Osasunbidea.  
14 Pamplona, Spain

15 <sup>5</sup>Patient Safety Observatory, Andalusian Agency for Health Care Quality, Seville, Spain

16 <sup>6</sup>Dr. Peset Health District. Valencia, Spain

17 <sup>7</sup>Hospital Clínico San Carlos, Servicio Madrileño de Salud. Madrid, Spain

18 <sup>8</sup>Pediatric Department, Hospital General Universitario de Alicante. Alicante, Spain

19 <sup>9</sup>CIBER de Enfermedades Raras, U724. Alicante, Spain

20 <sup>10</sup>Preventive Medicine and Public Health Department, Hospital Universitario Ramón y Cajal.  
21 Madrid, Spain

22 <sup>11</sup>Instituto Ramón y Cajal de Investigación Sanitaria (IRYCIS), Madrid, Spain.

23 <sup>12</sup>Centro de Investigación Biomédica en Red en Epidemiología y Salud Pública (CIBERESP),  
24 Spain.  
25  
26  
27  
28  
29

30 Corresponding author:

31 José Joaquín Mira

32 Universidad Miguel Hernández de Elche

33 Edificio Altamira

34 Avda. de la Universidad, s/n

35 03202 Elche (Alicante), Spain

36 jose.mira@umh.es

37 Telephone numbe: +34 966658984  
38  
39

40 Word count: 4070  
41  
42  
43  
44  
45  
46  
47  
48  
49  
50  
51  
52  
53  
54  
55  
56  
57  
58  
59  
60

## ABSTRACT

Objectives: Identified the sources of overuse from the point of view of the Spanish primary care professionals, and analyze the frequency of overuse due to pressure from patients in addition to the responses when professionals facing these demands.

Design: A cross-sectional study was conducted.

Setting: Primary Care in Spain.

Participants: A total number of 2201 providers (general practitioners, pediatricians, and nurses) were recruited during the survey.

Primary and secondary outcome measures: The frequency, causes, and responsibility for overuse, and the frequency that patients demand unnecessary tests or procedures and the frequency that professionals satisfy such demands, the types of requests, the profile of the most demanding patients, and arguments to dissuade the patient.

Results: In all, 936 general practitioners, 682 pediatricians, and 286 nurses replied. Patients request (67%) and medicine defensive (40%) were the most cited causes of overuse. Five hundred twenty-two (27%) received requests from their patients almost every day for unnecessary tests or procedures, and 132 (7%) recognized granting the requests. Higher pressure and aggressiveness by patients increased overuse ( $p < 0.001$ ). The lack of time in consultation, and printed and digital media contributed to the professional's inability to adequately counter this pressure by patients. Evidence and clinical safety were the arguments that dissuade patients from their requests the most ( $p < 0.001$ ). Cost savings are not a convincing argument, above all for pediatricians ( $p < 0.001$ ). General practitioners resisted more pressure from their patients ( $p < 0.001$ ), while nurses admitted to carrying out more unnecessary procedures ( $p < 0.001$ ).

Conclusion: Satisfy the patient and patient uncertainty about what should be done and the defensive medicine practices explains overuse. Providers differences facing patient request and avoiding defensive medicine are related to overuse.

## KEYWORDS

Medical overuse; Physician stewardship; Cost-conscious care; Health care costs; Physician decision-making; Health literacy

## STRENGTHS AND LIMITATIONS OF THIS STUDY

- The strengths of the present study include its large sample of providers working on an ample number of Spanish primary care health organizations. This sample included general practitioners, pediatricians and nurses.
- Frequency and causes of overuse were analyzed beside the profile of the most demanding patients, and arguments to dissuade the patient.
- The differences among providers facing patient request and avoiding defensive medicine are related to overuse.
- Although data are derived only from Spain, it is likely to be representative of the rest of the health systems where physicians are the gatekeeper.
- The study did not on a random selection of participants with a limited number of males in the cases of pediatrics and nursing even though their number is proportional

1  
2  
3  
4  
5  
6  
7  
8  
9  
10  
11  
12  
13  
14  
15  
16  
17  
18  
19  
20  
21  
22  
23  
24  
25  
26  
27  
28  
29  
30  
31  
32  
33  
34  
35  
36  
37  
38  
39  
40  
41  
42  
43  
44  
45  
46  
47  
48  
49  
50  
51  
52  
53  
54  
55  
56  
57  
58  
59  
60

to that of their presence within these professional groups. The data correspond to a health model funded by taxes.

For peer review only

## **Drivers and strategies to avoid overuse. The experience of Spanish primary-care-providers handling uncertainty and patients' request**

### **INTRODUCTION**

Among the causes of lack of quality are the incorrect use of diagnostic or therapeutic resources due to medical errors,[1-2] underuse,[3] and overuse.[4]

Overuse is understood as the provision of healthcare when lacking evidence or when the potential benefits from the procedure or treatment does not outweigh its risks.[5] Overuse of diagnostic and therapeutic resources is present in all specialties, all health systems,[4, 6] and at all care levels,[7] and it represents a threat to patient safety and the sustainability of health systems.[8] Reduce overuse in primary care is particularly relevant when the general practitioner is the gatekeeper of the health system. However, in many countries the actual pattern of overuse remains virtually unknown.[9]

### **Causes of overuse**

The immediate causes of overuse include[10-15] insufficient updating of knowledge by professionals, defensive medicine, the custom of doing things that have always been done, lack of time in consultation, inadequate incentives, influence by the pharmaceutical industry, and inadequate communication with patients. Patients requesting diagnostic tests[9, 16-17] or treatments based on personal beliefs or from information obtained by other patients or from the Internet[9, 18-19] they have been also introduced as cause of overuse.

Patients in primary care usually request diagnostic tests, referrals to specialists, and medications, more frequently antimicrobials and for reducing pain.[9, 20] These requests generate dissatisfaction and make professionals uncomfortable[21] because they call their clinical expertise into question,[22] and this affects the quality of the relationship with the patient. Primary care physicians accept and handle the relationship with the patient better in the case of requests for tests and referrals to specialists than when the patient requests certain medications.[23] However, they often manifest in a desire to fulfill their patients' expectations increasing overuse.[24] Other drivers of medical overuse from a primary care perspective includes also the lack of communicative skills or medical work experience, insufficient time during consultation and fear of malpractice.[9, 24-25]

### **Questions to be replayed**

There is little research on the role of the patient and professional in overuse, and most of it has been carried out in the USA, which has an organizational environment different from the models based on a national health system.[11] The few data there are suggest that medical recommendations to reduce overuse are difficult to follow and difficult for patients to accept,[26] although research is needed to discern profile of patients prone to accept or refuse these recommendations. It is hoped that the organizational model of the provision of healthcare has a direct influence on overuse. In the case of models where the primary care physician is the gatekeeper, one could expect greater pressure upon this professional.[27]

### **Objectives**

This study identified the sources of overuse from the point of view of the Spanish primary care professionals, and analyze the frequency of overuse due to pressure from patients in addition to the responses when professionals facing these demands.

### **METHOD**

1  
2  
3 This is an observational study based on an online survey directed at a group of primary care  
4 professionals in Spain: general practitioners, nurses, and pediatricians. The field study took  
5 place between March and July 2017.

### 6 **Setting**

7  
8 In Spain, the primary care provides stepped care based on the right care at the right place at  
9 the right time, balancing quality and costs. This system strengthens the gatekeeper role of  
10 general practitioners (and pediatricians in the case of children). They are the ones who make  
11 diagnostic and therapeutic decisions in every case, which includes the possibility of referrals to  
12 other specialists at hospitals.

13 Spanish territory is divided into health districts, and in turn, these are divided into health  
14 zones. Each zone contains a health center that is responsible for providing healthcare for that  
15 territorial demarcation, with general practitioners, pediatricians, and nurses. One health  
16 district attends to an average of some 250,000 residents. The composition of professionals on  
17 primary health teams vary depending upon the population of the health zone (ratio around  
18 1300 residents per general practitioner[28] and 1029 residents between the ages of 0 and 14  
19 per pediatrician).[29] The number of nurses is similar to that of general practitioners and  
20 pediatricians.[30]

### 21 **Materials**

22  
23 The scope of the survey was based on the instrument employed by the ABIM Foundation.[11]  
24 Seven blocks of questions were analyzed and 28 questions formulated. Specifically analyzed  
25 were the causes and responsibility of overuse unnecessary, tests or procedures demanded  
26 most by patients, the profile of the patient who insists upon these requests, the frequency of  
27 receiving requests and the frequency that the professional orders them, the arguments  
28 employed for dissuading the patient and the extent to which they succeed, the reactions by  
29 the patient to the professional's refusal. A pilot test on comprehending the questions was  
30 carried out with six professionals whose profiles were similar to those who participated in the  
31 study. Proposals for changes to the wording or response scales were incorporated into the  
32 final draft of the questions.

### 33 **Participants**

34  
35 To carry out the survey on a population of 63753 professionals (28294 general practitioners,  
36 6251 pediatricians and 29208 nurses), a minimal sample of 2201 professionals from all groups  
37 (general practitioners, pediatricians, and nurses) was determined, considering a 1% error, a  
38 confidence level of 95%,  $p=q=0.50$  and a response rate of 20%.

39  
40 The field study was conducted with collaboration by the health services of Andalucía, Aragón,  
41 Madrid, Navarra, and the Comunidad Valenciana, the Spanish Association of Primary Care  
42 Pediatrics (AEPap), the Spanish Society of Outpatient and Primary Care Pediatrics (SEPEAP),  
43 the Illustrious Official College of Physicians of Valencia, the Council of Nursing of the Valencian  
44 Community (CECOVA), and the Spanish Society of General and Family Practitioners (SEMG).  
45 These organizations invited their associates to participate in this study by email. They  
46 explained the study's scope to each group of primary care givers, its voluntary nature and the  
47 guarantees for the confidentiality of their responses, instructions on how to respond, and it  
48 provided a link to a Google Forms page where they could respond. A reminder to motivate  
49 responses was given.

### 50 **Non-eligible participants**

51  
52 The responses from professionals who indicated that they worked at hospitals or other centers  
53 different from primary care were excluded. Also, participants were excluded when three or  
54 more questions were not replayed.

### Potential sources of bias

The reasons why some professionals answered the survey and others did not could affect the meaning of their answers. A sampling error of 1% was defined to reduce its effect. A leading questions bias was controlled using validate questions although some participants encouraged answers expected from the researcher.

### Statistical methods

Data analysis was completed using descriptive and inferential descriptive statistics, with chi-square and ANOVA to establish relationships between qualitative variables and between qualitative and quantitative variables, respectively. The overuse experience was distinguished by different types of providers. The null hypothesis was rejected when  $P < 0.05$ .

### Ethical approbation

This study was assessed and approved by the Ethics Committee of Primary Care Research of the Valencian Community, Spain.

## RESULTS

In all, 2098 professionals provided complete response, achieving a 95.3% of the responses expected. Of these, 194 indicated they were working in hospitals, so the responses from 1904 professionals (936 general practitioners, 682 pediatricians, and 286 nurses) (Table 1) were coded and analyzed. Most of these, 1190 (62.5%), were recruited by invitation from professional societies, and 714 (37.5%) were invited by their health services. There were 1816 (95.4%) working at health centers from the Spanish public health system, with the remainder either working in private health or practicing in both professional fields. Three-quarters of the sample ( $N=1432$ , 75.2%) had more than 15 years of professional experience. Males in pediatrics and nursing, in addition to the professionals from the private sector, were underrepresented in a manner similar to their proportion in the makeup of primary care in Spain.[31]

Table 1. Description of the sample of professionals whose responses were analyzed.

|                                      | Nurses<br>(N = 286) |      | General practitioners<br>(N = 936) |      | Pediatricians<br>(N = 682) |      |
|--------------------------------------|---------------------|------|------------------------------------|------|----------------------------|------|
|                                      | N                   | %    | N                                  | %    | N                          | %    |
| Professional experience              |                     |      |                                    |      |                            |      |
| ≤ 5 years                            | 20                  | 7    | 38                                 | 4.1  | 65                         | 9.5  |
| Between 6 and 15 years               | 41                  | 14.3 | 142                                | 15.2 | 166                        | 24.3 |
| Between 16 and 29 years              | 129                 | 45.1 | 470                                | 50.2 | 268                        | 39.3 |
| More than 30 years                   | 96                  | 33.6 | 286                                | 30.6 | 183                        | 26.8 |
| Gender                               |                     |      |                                    |      |                            |      |
| Male                                 | 60                  | 21   | 429                                | 45.8 | 196                        | 28.7 |
| Female                               | 226                 | 79   | 507                                | 54.2 | 486                        | 71.3 |
| Area of professional practice        |                     |      |                                    |      |                            |      |
| Public system                        | 286                 | 100  | 892                                | 95.3 | 638                        | 93.5 |
| Private or both                      | 0                   | 0    | 44                                 | 4.7  | 44                         | 6.5  |
| Belongs to (institution or organism) |                     |      |                                    |      |                            |      |
| Public health system                 | 259                 | 90.6 | 317                                | 33.9 | 138                        | 20.2 |



|  |                                                              |    |     |     |      |     |      |
|--|--------------------------------------------------------------|----|-----|-----|------|-----|------|
|  | CECOVA                                                       | 27 | 9.4 | --  | --   | --  | --   |
|  | SEMG                                                         | -- | --  | 464 | 49.6 | --  | --   |
|  | Illustrious Official<br>College of Physicians of<br>Valencia | -- | --  | 155 | 16.6 | 62  | 9.1  |
|  | AEPap                                                        | -- | --  | --  | --   | 280 | 41.1 |
|  | SEPEAP                                                       | -- | --  | --  | --   | 202 | 29.6 |

CECOVA - Council of Nursing of the Valencian Community

SEMG - Spanish Society of General and Family Practitioners

AEPap - Spanish Association of Primary Care Pediatrics

SEPEAP - Spanish Society of Outpatient and Primary Care Pediatrics

### Causes of overuse

The reasons that general practitioners and pediatricians gave as being more directly responsible for inappropriate overuse were patient (or guardian) insistence and the need to attain greater safety or control over the process (Table 2). Male general practitioners, compared to their female counterparts, showed a greater tendency to justify inappropriate overuse on the grounds of satisfying the patient ( $\chi^2=5.2$ ,  $p=0.024$ ). As causes of overuse, less experienced general practitioners indicated following regulations ( $\chi^2=14.4$ ,  $p=0.002$ ), making the patient feel satisfied with the care received ( $\chi^2=11.0$ ,  $p=0.011$ ), and avoiding possible claims ( $\chi^2=8.6$ ,  $p=0.035$ ). When comparing the opinions of general practitioners who only worked within the public sector with those who worked in both those public and private, it was observed that the former tended to consider the lack of time in consultation as a reason for overuse more frequently ( $\chi^2=13.1$ ,  $p=0.001$ ). However, for the latter (with activities in both the public and private systems), avoiding a claim by patients was more important ( $\chi^2=21.2$ ,  $p=0.001$ ), and they more frequently considered that the practice guides they used as reference were obsolete ( $\chi^2=6.8$ ,  $p=0.009$ ). Pediatricians who combined activities in both sectors reported more frequently on the difficulties of dissuading the guardian and making him/her see that the procedures requested for the child were unnecessary ( $\chi^2=4.6$ ,  $p=0.037$ ). General practitioners ( $\chi^2=11.8$ ,  $p=0.001$ ) and pediatricians ( $\chi^2=5.8$ ,  $p=0.018$ ) who only worked in the public sector felt more pressured by patients than those who practiced in both sectors.

Table 2. Reasons for ordering an unnecessary test or carrying out an unnecessary procedure.

|                                                                                 | General practitioners<br>(N = 936) |      | Pediatricians<br>(N = 682) |      | Chi <sup>2</sup> | P-Value |
|---------------------------------------------------------------------------------|------------------------------------|------|----------------------------|------|------------------|---------|
|                                                                                 | N                                  | %    | N                          | %    |                  |         |
| To gain greater control and safety of the case                                  | 359                                | 38.4 | 291                        | 42.7 | 3.1              | 0.081   |
| Due to the standard or custom of making the order in the area                   | 111                                | 11.9 | 21                         | 3.1  | 40.1             | 0.001   |
| To avoid a future demand                                                        | 200                                | 21.4 | 92                         | 13.5 | 16.6             | 0.001   |
| To satisfy the patient                                                          | 196                                | 20.9 | 92                         | 13.5 | 15.0             | 0.001   |
| Out of respect for the patient's decisions                                      | 132                                | 14.1 | 130                        | 19.1 | 7.1              | 0.009   |
| Due to lack of time for patient consultation                                    | 418                                | 44.7 | 198                        | 29.0 | 40.8             | 0.001   |
| Because I do not know how to make the patient understand that it is unnecessary | 262                                | 28.1 | 150                        | 22.0 | 7.5              | 0.007   |

|                                                  |     |      |     |      |      |       |
|--------------------------------------------------|-----|------|-----|------|------|-------|
| To avoid a claim                                 | 177 | 18.9 | 80  | 11.7 | 15.2 | 0.001 |
| To carry out epidemiological or clinical studies | 19  | 2.0  | 26  | 3.8  | 4.6  | 0.045 |
| Due to indications in obsolete guides            | 26  | 2.8  | 19  | 2.8  | 0.0  | 1.000 |
| Due to insistent pressure by the patient         | 627 | 67   | 398 | 58.4 | 12.6 | 0.001 |

### Responsibility for overuse

The responsibility for overuse was assigned to, in order, the patients' relatives, the mass media, the professionals themselves, health pages on the Internet, and defensive medicine practices (Table 3). Male professionals attributed the responsibility for overuse of resources due to pressure by patients more directly on health services senior management ( $F=4.3$ ,  $p=0.038$ ). Professionals with fewer years of experience attributed greater responsibility for this overuse to the very professionals ( $F=9.6$ ,  $p<0.001$ ) and defensive medicine ( $F=4.4$ ,  $p<0.001$ ). Those solely working in the public health system (as opposed to those who also worked in private practice) held the media ( $F=6.4$ ,  $p=0.011$ ) and patients' relatives ( $F=4.5$ ,  $p=0.03$ ) more directly accountable. No cross-effects from the interaction of these variables were observed.

Table 3. Responsibility for overuse in the opinion of the professionals surveyed.

|                                                       | Nursing<br>(N = 286) |     | General Medicine<br>(N = 936) |     | Pediatrics<br>(N = 682) |     | F     | P-Value |
|-------------------------------------------------------|----------------------|-----|-------------------------------|-----|-------------------------|-----|-------|---------|
|                                                       | Average              | SD  | Average                       | SD  | Average                 | SD  |       |         |
| Senior management of health systems                   | 6.5                  | 2.8 | 6.5                           | 2.7 | 5.3                     | 3.0 | 38.5  | 0.001   |
| Center directors                                      | 6.0                  | 2.8 | 5.4                           | 2.8 | 4.4                     | 2.9 | 37.1  | 0.001   |
| Directors or Coordinators of nursing/physicians       | 5.9                  | 2.7 | 4.7                           | 2.8 | 4.2                     | 2.8 | 39.3  | 0.001   |
| Nurses/Physicians                                     | 6.7                  | 2.4 | 7.0                           | 2.1 | 7.4                     | 2.2 | 13.2  | 0.001   |
| Patient associations                                  | 5.7                  | 2.5 | 6.2                           | 2.7 | 5.4                     | 2.8 | 15.5  | 0.001   |
| Press, radio, and television                          | 7.0                  | 2.6 | 7.6                           | 2.5 | 6.8                     | 2.6 | 21.2  | 0.001   |
| Managers of Internet health platforms                 | 6.8                  | 2.4 | 7.0                           | 2.6 | 6.3                     | 2.6 | 14.8  | 0.001   |
| Patients                                              | 7.7                  | 2.1 | 7.5                           | 2.1 | 5.0                     | 3.3 | 194.7 | 0.001   |
| Relatives of patients                                 | 7.8                  | 1.9 | 7.5                           | 2.2 | 7.7                     | 2.2 | 3.6   | 0.027   |
| As a defensive measure against possible future claims | 7.4                  | 2.3 | 6.8                           | 2.3 | 6.4                     | 2.4 | 18.8  | 0.001   |

Scale from 0 to 10, minimum and maximum responsibility, respectively.

### Pressure by patients and responses from professionals

Only 31 (1.6%) of those surveyed said that they had not received any requests from patients (more frequent among professionals with more than 15 years of experience), while 103 (5.4%) said that they received requests like these from patients every day (normally younger professionals). General practitioners were those who claimed to be under greater pressure to carry out unnecessary tests or procedures ( $\chi^2=88.8$ ,  $p<0.001$ ). However, it was the nurses who admitted to carrying out these types of unnecessary procedures more frequently; pediatrics did so the least ( $\chi^2=175.7$ ,  $p<0.001$ ) (Table 4).

Table 4. Pressure from patients and response by professionals.

|                                        | Patients (or their guardians) request unnecessary tests and procedures from you |      | You order/carry out unnecessary tests or procedures due to pressure from a patient (or guardian) |      | You convince the patient (or guardian) that it is unnecessary and can pose significant risk |      | The patient's response is negative, or even aggressive, when you refuse to carry out a procedure that the patient requests from you |      |                      |
|----------------------------------------|---------------------------------------------------------------------------------|------|--------------------------------------------------------------------------------------------------|------|---------------------------------------------------------------------------------------------|------|-------------------------------------------------------------------------------------------------------------------------------------|------|----------------------|
|                                        | N                                                                               | %    | N                                                                                                | %    | N                                                                                           | %    | N                                                                                                                                   | %    |                      |
| <b>General practitioners (N = 936)</b> |                                                                                 |      |                                                                                                  |      |                                                                                             |      |                                                                                                                                     |      |                      |
| Never                                  | 12                                                                              | 1.3  | 118                                                                                              | 12.6 | 55                                                                                          | 5.9  | 237                                                                                                                                 | 25.3 | Never                |
| Monthly                                | 192                                                                             | 20.5 | 463                                                                                              | 49.5 | 248                                                                                         | 26.5 | 400                                                                                                                                 | 42.7 | Sometimes            |
| Almost every week                      | 396                                                                             | 42.3 | 271                                                                                              | 29.0 | 356                                                                                         | 38.0 | 168                                                                                                                                 | 17.9 | One-half of the time |
| Almost every day                       | 260                                                                             | 27.8 | 69                                                                                               | 7.4  | 227                                                                                         | 24.3 | 92                                                                                                                                  | 9.8  | Most of the time     |
| Every day                              | 76                                                                              | 8.1  | 15                                                                                               | 1.6  | 50                                                                                          | 5.3  | 39                                                                                                                                  | 4.2  | All the time         |
| <b>Pediatricians (N = 682)</b>         |                                                                                 |      |                                                                                                  |      |                                                                                             |      |                                                                                                                                     |      |                      |
| Never                                  | 9                                                                               | 1.3  | 188                                                                                              | 27.6 | 14                                                                                          | 2.1  | 231                                                                                                                                 | 33.9 | Never                |
| Monthly                                | 228                                                                             | 33.4 | 401                                                                                              | 58.8 | 182                                                                                         | 26.7 | 343                                                                                                                                 | 50.3 | Sometimes            |
| Almost every week                      | 316                                                                             | 46.3 | 84                                                                                               | 12.3 | 262                                                                                         | 38.4 | 73                                                                                                                                  | 10.7 | One-half of the time |
| Almost every day                       | 113                                                                             | 16.6 | 6                                                                                                | 0.9  | 188                                                                                         | 27.6 | 30                                                                                                                                  | 4.4  | Most of the time     |
| Every day                              | 16                                                                              | 2.3  | 3                                                                                                | 0.4  | 36                                                                                          | 5.3  | 5                                                                                                                                   | 0.7  | All the time         |
| <b>Nurses (N = 286)</b>                |                                                                                 |      |                                                                                                  |      |                                                                                             |      |                                                                                                                                     |      |                      |
|                                        | N                                                                               | %    | N                                                                                                | %    | N                                                                                           | %    | N                                                                                                                                   | %    |                      |

|                   |     |      |     |      |     |      |     |      |                      |
|-------------------|-----|------|-----|------|-----|------|-----|------|----------------------|
| Never             | 10  | 3.5  | 37  | 12.9 | 9   | 3.1  | 36  | 12.6 | Never                |
| Monthly           | 82  | 28.7 | 123 | 43.0 | 106 | 37.1 | 158 | 55.2 | Sometimes            |
| Almost every week | 137 | 47.9 | 87  | 30.4 | 71  | 24.8 | 36  | 12.6 | One-half of the time |
| Almost every day  | 46  | 16.1 | 31  | 10.8 | 92  | 32.2 | 54  | 18.9 | Most of the time     |
| Every day         | 11  | 3.8  | 8   | 2.8  | 8.0 | 2.8  | 2   | 0.7  | All the time         |

The professionals who reported receiving requests from patients for unnecessary tests or procedures more frequently were those who acknowledged either ordering tests (every day or almost every day) for them or carrying out unnecessary procedures themselves for patients ( $\chi^2=490.3$ ,  $p<0.001$ ). They also stated that the reaction by the patient (or guardian) when a request for tests or procedures was denied was more negative or aggressive ( $\chi^2=475.8$ ,  $p<0.001$ ). Those who said they were less capable of convincing patients that such request was unnecessary or that it increased the risk of an adverse event claimed to receive requests by patients for unnecessary tests or procedures more frequently ( $\chi^2=123.5$ ,  $p<0.001$ ), and they also said more frequently that the reaction by the patient (or guardian) when refusing such request was aggressive ( $\chi^2=476.9$ ,  $p<0.001$ ).

Male nurses, compared to their female counterparts, reported greater pressure from patients to carry out unnecessary procedures ( $\chi^2=14.8$ ,  $p=0.005$ ) and, compared with the females, carried out these unnecessary procedures more frequently ( $\chi^2=14.1$ ,  $p=0.007$ ). The ability to dissuade patient requests was similar in men and women in all three professional profiles. However, male nurses, compared to those female, reported receiving an aggressive response more frequently ( $\chi^2=13.6$ ,  $p=0.009$ ).

Pediatricians with less than 5 years of experience reported receiving requests for unnecessary tests or procedures most frequently ( $\chi^2=52.6$ ,  $p<0.001$ ). Pediatricians who had practiced fewer years stated that when refusing a patient's request, the patient's reaction was frequently more negative or even aggressive in comparison to their more experienced colleagues ( $\chi^2=68.4$ ,  $p<0.001$ ).

### What patients request

The most frequent requests from patients were for routine analytical examinations, referrals to specialists, antimicrobial treatments, radiological studies, and requests for healing materials without indication (Table 5). The profile of the patient who requested unnecessary nursing procedures the most corresponded to that of a woman (145, 50.7%) over 66 years of age (158, 55.2%) who suffered various chronic conditions (154, 53.8%). In the case of general practitioners, these were usually women (604, 64.5%) between 51 and 65 years of age (411, 43.9%) with a low prevalence pathology (296, 31.6%) or one that was unspecified (219, 23.4%) and who consulted the Internet about their concerns (172, 18.4%). In pediatrics, the profile of the guardian who most persistently requested unnecessary tests or procedures corresponded to the mother of a patient (480, 70.4%) who suffered an unspecified pathology (367, 53.8%) and who usually sought information on health webpages (130, 19.1%).

Table 5. Unnecessary tests and procedures patients usually request.

| General practitioners<br>(N = 936)                                    | N   | %    | Pediatricians<br>(N = 682)                                                  | N   | %    | Nurses<br>(N = 286)                                                                     | N   | %    |
|-----------------------------------------------------------------------|-----|------|-----------------------------------------------------------------------------|-----|------|-----------------------------------------------------------------------------------------|-----|------|
| Routine checkup analysis                                              | 709 | 75.7 | Routine checkup analysis                                                    | 510 | 74.8 | Taking vital signs                                                                      | 225 | 78.7 |
| Referrals to specialists without any concerning features <sup>§</sup> | 628 | 67.1 | Administration of antibiotics when is not recommended <sup>§</sup>          | 491 | 72.0 | Administration of treatment that does not require professionals                         | 175 | 61.2 |
| Radiological studies without any concerning features <sup>§</sup>     | 570 | 60.9 | Referrals to other specialists without any concerning features <sup>§</sup> | 450 | 66.0 | Delivery of healing materials without indication                                        | 84  | 29.4 |
| Magnetic Resonance without any concerning features <sup>§</sup>       | 380 | 40.6 | Radiological studies without any concerning features <sup>§</sup>           | 197 | 28.9 | Delivery of glucometer without the patient having started hypoglycemia treatment        | 72  | 25.2 |
| PSA* in asymptomatic patients                                         | 358 | 38.2 |                                                                             |     |      | Administer vaccinations outside the vaccine calendar without indication by pediatrician | 34  | 11.9 |
| Administration of antibiotics when is not recommended <sup>§</sup>    | 348 | 37.2 |                                                                             |     |      |                                                                                         |     |      |
| Computed Tomography when is not recommended <sup>§</sup>              | 280 | 29.9 |                                                                             |     |      |                                                                                         |     |      |

\*PSA - prostate-specific antigen

<sup>§</sup>following Do not DO Recommendations from Grupo de trabajo de la SEMFyC para el proyecto Recomendaciones «NO HACER». Recomendaciones NO HACER. Barcelona: SEMFyC ediciones, 2014, and Asociación Española de Pediatría (AEP). Recomendaciones de “no hacer” en Pediatría. 2014 [consultado 24-06-2017]: Available in: <http://www.aeped.es/documentos/recomendaciones-no-hacer-en-pediatria>.

### Ideas that work to dissuade the patient

According to the majority of those surveyed, the arguments that worked best for dissuading the patient or guardian that the request was inadequate were clinical reasons and for patient safety (Table 6). The safety of ( $\chi^2=31.7$ ,  $p<0.001$ ) and avoiding discomfort in the child ( $\chi^2=57.7$ ,  $p<0.001$ ) were considered more effective arguments, above all for pediatricians. Cost savings was the least effective argument for pediatricians ( $\chi^2=43.9$ ,  $p<0.001$ ), while avoiding patient discomfort was least effective for general practitioners ( $\chi^2=57.7$ ,  $p<0.001$ ). For more experienced pediatricians ( $\chi^2=30.6$ ,  $p=0.002$ ) and nurses ( $\chi^2=23.6$ ,  $p=0.023$ ), arguing clinical reasons to dissuade the patient or guardian's request worked better.

Table 6. Degree of effectiveness as reported by the professionals about the arguments for convincing the patient that the treatment or procedure is unnecessary.

| Argument | General practitioners<br>N = 936 | Pediatricians<br>N = 682 | Nurses<br>N = 286 | Chi <sup>2</sup> | P-<br>Value= | Total<br>N = 1904 |
|----------|----------------------------------|--------------------------|-------------------|------------------|--------------|-------------------|
|----------|----------------------------------|--------------------------|-------------------|------------------|--------------|-------------------|

|                                                                    | N   | %    | N   | %    | N   | %    |      | N     | %   |      |
|--------------------------------------------------------------------|-----|------|-----|------|-----|------|------|-------|-----|------|
| Patient safety                                                     | 361 | 60.8 | 311 | 73.5 | 106 | 57.0 | 23.3 | 0.000 | 778 | 64.7 |
| Clinical reasons based on knowledge                                | 352 | 58.3 | 297 | 66.1 | 102 | 55.1 | 9.5  | 0.009 | 751 | 60.7 |
| The result is achieved by other procedures                         | 320 | 56.5 | 254 | 61.8 | 91  | 50.3 | 7.2  | 0.028 | 665 | 57.4 |
| Saves patient discomfort                                           | 119 | 18.4 | 144 | 33.6 | 65  | 32.7 | 36.9 | 0.000 | 328 | 25.8 |
| Saves time and money that have a positive effect on other patients | 68  | 8.6  | 29  | 4.8  | 32  | 14.0 | 20.0 | 0.000 | 129 | 8.0  |

*High and Very High degrees of effectiveness shown*

Pediatricians were more successful than general practitioners and nurses at dissuading their patient that the requested test or procedure was unnecessary or that it posed unnecessary risk ( $\chi^2=45.0$ ,  $p<0.001$ ). Nurses reported more frequently that the patient's reaction to a request being refused due to being unnecessary was either negative or aggressive ( $\chi^2=129.5$ ,  $p<0.001$ ). Men and women from all three professional profiles expressed a similar ability for dissuading a patient's request. Less experienced pediatricians stated they were able to dissuade patients more frequently than other pediatricians ( $\chi^2=23.9$ ,  $p=0.021$ ).

Patients who requested healing materials to take home (24/48,  $\chi^2=15.2$ ,  $p=0.004$ ), vaccinations outside the vaccine calendar (11/34,  $\chi^2=10.1$ ,  $p=0.039$ ), and antibiotic treatments (31/491,  $\chi^2=33.4$ ,  $p<0.001$ ) were those who, in the opinion of the professionals surveyed, were least willing to accept explanations and refusals by the professionals for their request.

According to 1231 (64.7%) of those surveyed, an educational campaign directed at the population would help reduce the number of requests for unnecessary tests and procedures by patients. Such a campaign was seen as most useful by general practitioners (general practitioners, 8.0, SD 2.1, CI 95% 7.9-8.0; pediatricians, 7.7, SD 2.0, CI 95% 7.6-7.9; nurses, 7.7, SD 2.0; CI 95% 7.6-7.8). This opinion was independent of the respondent's experience as to whether the patient's response to the request being denied was negative ( $F=1.3$ ,  $p=0.266$ ) and the ability the professional believed to have in dissuading the patient ( $F=1.7$ ,  $p=0.140$ ).

## DISCUSSION

The results of this study confirm the role that patients' requests and the medicine defensive play in overuse. In this study, women patients and patients who suffer an unspecified or yet-undiagnosed pathology exerted greater pressure upon the professionals. For the former group, and in order to interpret this result, it needs to be taken into consideration that in many European countries females frequently accompany the patient in the consultation (adult or minor).[36] As for the latter case, one needs to consider that in addition to the fears the very patient experiences due to the uncertainty of not knowing what is happening to him/her, there is added pressure from family members, the effect from consulting health news on the Internet, and news from the printed and digital media about medical advances and new techniques. Although professionals are directly responsible for overuse, and this and other research recognize this as such,[27, 33] we must also consider the role that patient associations, accreditation systems of websites, and associations of health news informers could play to succeed, among everybody, in reducing overuse figures.

In this case, it has been proven that overuse also has roots in the insecurity that an ill-defined pathology instills within the professional, the fear of an uncertain outcome for the indicated treatment, as well as the potential effects from a subsequent complaint by the patient or a

1  
2  
3 lawsuit filed in a court of law. If we take into account the lack of a diagnosis, and then to it add  
4 on the lack of time in consultation and the need for greater security for the very professional,  
5 we find another of the main causes of overuse.[36]

6 For a significant portion of physicians, and for those surveyed in this study as well, maintaining  
7 a positive relationship with the patient was essential,[25, 27] probably because it is one of the  
8 basic therapeutic resources in primary care.[32] Not responding to a request or not knowing  
9 how to dissuade the patient muddies the relationship. Furthermore, when the patient  
10 questions the physician's clinical expertise, their relationship worsens and defensive medicine  
11 tends to increase.[4, 8]

12  
13 Previous research had found that, when compared to other specialties, general practitioners  
14 were under greater pressure from their patients for unnecessary medical tests or procedures  
15 to be carried out on them.[33] The fact that patients in primary care exert greater pressure  
16 than in hospitals is observed in both organizational models of payment for medical acts as well  
17 as in systems where the physician is the gatekeeper.[27, 33-34] These results should be  
18 interpreted keeping in mind the assessment that patients give about both care levels in every  
19 country and the belief that super specialization might be a key to quality medicine.

20  
21 This study's findings reveal that as pressure from patients becomes more insistent, the  
22 professionals either order or carry out a greater number of unnecessary test and procedures,  
23 extending the initial observations general practitioners tend to accept requests from their  
24 patients more so than other specialists.[34] General practitioners are pressured more by their  
25 patients than pediatricians or nurses, although the latter are those who carry out unnecessary  
26 procedures more frequently, probably because this group acknowledges being on the  
27 receiving end of more aggressive responses from patients when turning down requests.  
28 Nevertheless, these results should be qualified based on the request the patient makes and by  
29 the dissemination of practice guides between professionals. It is unlikely that ordering a test  
30 such as the Prostate-Specific Antigen test (PSA) in an asymptomatic male who insists so he can  
31 "rest easy" is the same as initiating a totally contraindicated treatment and one that poses  
32 risks for the patient. Most physicians accept the first situation more easily,[35] but resist the  
33 second.[23, 36]

34  
35 Information does not always contribute to fulfill these recommendations.[26] However,  
36 providing the patient with clear and direct information about the clinical and safety reasons  
37 that advise against carrying out certain tests or starting certain treatments contributes to  
38 reducing overuse.[37-38] These results follow this line and confirm findings from research  
39 conducted in other countries where primary care physicians draw on evidence to dissuade a  
40 patient's request for a certain diagnostic test when they deem it unnecessary.[23] The other  
41 argument that has also demonstrated its usefulness for dissuading the patient is safety, above  
42 all for pediatricians. Considering the Spanish study with hospital physicians,[39] the  
43 effectiveness of general practitioners and pediatricians in dissuading patients is similar to that  
44 of their colleagues at hospitals. The pediatricians in this study did not report a dissuasive  
45 capacity any different from that of their colleagues who care for adults.

46  
47 The professionals who fail to dissuade patients from their requests feel as if they are under  
48 greater pressure, they end up carrying out more unnecessary tests and procedures, and they  
49 also receive more aggressive responses from their patients when refusing to carry out any of  
50 their requests. Curiously enough, these results show that as requests from patients become  
51 more misguided, for example vaccinating a minor outside the vaccine calendar, an antibiotic  
52 when it is contraindicated, or giving healing materials to the patient so he/she can take them  
53 home, the response from these patients is more negative, and even aggressive. Both of these  
54 results could support the opinions of those surveyed about the usefulness of carrying out an  
55 educational campaign among the population and the measures that have been adopted to  
56  
57  
58  
59

1  
2  
3 prevent aggression towards professionals. Although we do know that the lack of time in  
4 consultation has a negative effect on clinical safety,[40] these data do not permit us to  
5 determine whether the ability to dissuade patients from their requests might be different if  
6 more time were dedicated per patient.

7  
8 The frequency of requests for medical tests or procedures in the study by Zambrana & Lozano  
9 [39] in Spanish hospitals exceeded the frequency of requests that physicians in American  
10 hospitals reported by 16 percentage points. In this study in primary care, the frequency that  
11 general practitioners said they receive requests from their patients was 38 percentage points  
12 higher than what American physicians reported (78% versus 40%). The tendency in published  
13 figures of overuse from organizational models of primary care similar to that of the Spanish  
14 model [27] point in a similar direction, and suggests the gatekeeper's implication could not  
15 enough to prevent (or at least reduce) overuse. Moreover, this debate remains open because  
16 other studies conducted in the USA [34] indicate that overuse in the wake of patient requests  
17 is similar at health centers in both wealthy areas and others with lower income levels.

18  
19 Ignorance on behalf of the population has been analyzed in other research, especially that  
20 regarding the use of therapies and requests for diagnostic imaging tests irrespective of the risk  
21 from the ionizing radiation involved.[41] The frequency of overuse resulting from movements  
22 grouped together under the "Less is More Medicine" label[42] has begun to be studied  
23 systematically, and various campaigns have been launched to raise awareness in professionals  
24 about what must not be done,[43-45] but studies analyzing the roles of patients and  
25 professionals in overuse and the impact from campaigns to reduce overuse directed at the  
26 population are still scarce. Furthermore, campaigns for reducing overuse in the style of  
27 Choosing Wisely [45] confirm the need to influence health education, but also directed  
28 especially at drawing attention to the risks from interpreting health websites without the  
29 appropriate information, like, for example, considering their latest update, sources of  
30 information, and the commitment to the quality of their contents,[46] and reducing the  
31 negative impact that these sources of information are beginning to have on the relationship  
32 between patients and professionals.[14, 47] This is also true in the case of publicly financed  
33 health systems, to carry out campaigns to fortify solidarity behavior and properly use  
34 diagnostic and therapeutic resources.

### 35 36 **Practical implications**

37  
38 These results have direct implications on the professional level. First, fostering training in  
39 communication skills, highlighting how to approach communication with a patient who applies  
40 pressure to receive an unnecessary and/or harmful test or treatment for him or herself. For  
41 example, by promoting the so-called web prescription by recommending safe sites to patients  
42 where they can become informed, an aspect in which Spain lags somewhat behind.[47]  
43 Second, establishing a framework of greater legal security for professionals who act in  
44 accordance with practice guides.

45  
46 On the health organization level, these results reinforce the need to establish the  
47 implementation in primary care of up-to-date practice guides and to establish alerts and  
48 assistance algorithms (including arguments for patients) on the ordering of tests, referrals, and  
49 prescriptions for limiting overuse. Management indicators and annual or biennial targets could  
50 include indicators related to overuse, especially in those cases where, furthermore, the risk to  
51 patient safety increases.

### 52 53 **Generalizability**

54  
55 These results and recommendations could be applied to the healthcare systems where the  
56 general practitioners (or pediatricians in the case of children) are the gatekeeper.

### 56 57 **Limitations**



1  
2  
3 This study was based on a non-random selection of participants. The willingness to respond  
4 could bias the sample selection. Although the public sector is overrepresented, this  
5 overrepresentation is also observed in the reference population. The limited number of males  
6 who answered in the cases of pediatrics and nursing limits the strengths of the comparisons,  
7 even though their number is proportional to that of their presence within these professional  
8 groups. The data correspond to a health model funded by taxes.

9  
10 Overuse is a challenge for health systems, particularly those where the general practitioner is  
11 the system gatekeeper, and it requires responses from both the clinical as well as economic  
12 points of view.

### 13 **CONTRIBUTORS**

14  
15 JJM and JMA-A conceived and designed the study. CS, PP-P, CN, OG and JG acquired the data  
16 for the work. IC prepared the data and together with JJM and JMA-A conducted statistical  
17 analysis. All interpreted data for the work. JJM and IC prepared a first draft of the manuscript.  
18 All authors revised the paper critically for important intellectual content and approved the  
19 final version.

### 22 **FUNDING**

23  
24 This study was made possible by a grant from the European Regional Development Fund  
25 (ERDF) call for Health Research, reference PI16/00816.

### 27 **COMPETING INTERESTS**

28  
29 None

### 32 **ACKNOWLEDGEMENTS**

33  
34 Involvement in the study by the health services and related organizations and institutions were  
35 indispensable for carrying out this study. We are grateful to the health services of Andalucía,  
36 Aragón, Madrid, Navarra, and Comunidad Valenciana, the Spanish Association of Primary Care  
37 Pediatrics (AEPap), Spanish Society of Outpatient and Primary Care Pediatrics (SEPEAP),  
38 Illustrious Official College of Physicians of Valencia, Council of Nursing of the Valencian  
39 Community (CECOVA), and the Spanish Society of General and Family Practitioners (SEMG).

### 43 **REFERENCES**

- 44  
45 1 Lainer M, Vögele A, Wensing M, et al. Improving medication safety in primary care.  
46 A review and consensus procedure by the LINNEAUS collaboration on patient safety in primary  
47 care. *Eur J Gen Pract* 2015;21 Suppl:14–8.
- 48  
49 2 Hatoun J, Chan JA, Yaksic E, et al. A Systematic Review of Patient Safety Measures in  
50 Adult Primary Care. *Am J Med Qual* 2017;32:237–45.
- 51  
52 3 Glasziou P, Straus S, Brownlee S, et al. Evidence for underuse of effective medical services  
53 around the world. *Lancet* 2017 8;390:169–77.
- 54  
55 4 Morgan DJ, Wright SM, Dhruva S. Update on Medical Overuse. *JAMA Intern Med*  
56 2015;175:120–4.

- 1
- 2
- 3 5 Chassin MR, Galvin RW. The urgent need to improve health care quality. Institute of  
4 Medicine National Roundtable on Health Care Quality. *JAMA* 1998;280:1000–05.
- 5 6 Brownlee S, Chalkidou K, Doust J, et al. Evidence for overuse of medical services around the  
6 world. *Lancet* 2017;390:156–68.
- 7
- 8 7 Schoen C, Osborn R, Squires D, et al. A Survey Of Primary Care Doctors In Ten Countries  
9 Shows Progress In Use Of Health Information Technology, Less In Other Areas. *Health Aff*  
10 *(Millwood)* 2012; 31:2805–16.
- 11 8 Panella M, Leigheb F, Rinaldi C, et al. Defensive Medicine: Defensive Medicine: Overview of  
12 the literature. *Ig Sanita Pubbl* 2015;71:335–51.
- 13
- 14 9 Selby K, Cornuz J, Cohidon C, et al. How do Swiss general practitioners agree with and report  
15 adhering to a top-five list of unnecessary tests and treatments? Results of a cross-sectional  
16 survey. *Eur J Gen Prac* 2017;1–7. doi: 10.1080/13814788.2017.1395018
- 17
- 18 10 Sirovich BE, Woloshin S, Schwartz LM. Too little? Too much? Primary care physicians' views  
19 on US health care: a brief report. *Arch Intern Med* 2011;171:1582–5.
- 20 11 PerryUndem Research/Communication. Unnecessary Tests and Procedures In the Health  
21 Care System: What Physicians Say About The Problem, the Causes, and the Solutions: Results  
22 from a National Survey of Physicians. ABIM Foundation; 2014 May.
- 23
- 24 12 Cummins RO. Clinicians' reasons for overuse of skull radiographs. *AJR Am Roentgenol*  
25 1980;135:549–52.
- 26 13 Tilburt JC, Wynia MK, Sheeler RD, et al. Views of US physicians about controlling health care  
27 costs. *JAMA* 2013;310:380–8.
- 28
- 29 14 Mira JJ, Guilabert M, Pérez-Jover V, et al. Barriers for an effective communication around  
30 clinical decision making: an analysis of the gaps between doctors' and patients' point of view.  
31 *Health Expect* 2014;17:826–39.
- 32
- 33 15 Buist DSM. Primary Care Clinicians' Perspectives on Reducing Low-Value Care in an  
34 Integrated Delivery System. *Perm J* 2016;20:41–6.
- 35 16 Freudenberg LS, Beyer T. Subjective perception of radiation risk. *J Nucl Med* 2011;52 Suppl  
36 2:29S–35S.
- 37
- 38 17 Kruger JF, Chen AH, Rybkin A, et al. Clinician perspectives on considering radiation exposure  
39 to patients when ordering imaging tests: a qualitative study. *BMJ Qual Saf* 2014;23:893–901.
- 40 18 Diaz, JA, Griffith RA, Ng JJ, et al. Patients' Use of the Internet for Medical Information. *J Gen*  
41 *Intern Med* 2002;17:180–5.
- 42
- 43 19 Mira JJ, Llinás G, Lorenzo S, et al. Uso de Internet por médicos de primaria y hospitales y  
44 percepción de cómo influye en su relación con los pacientes. *Aten Primaria* 2009;41:308–14.
- 45 20 Silverstein W, Lass E, Born K, et al. A survey of primary care patients' readiness to engage in  
46 the de-adoption practices recommended by Choosing Wisely Canada. *BMC Res Notes*  
47 2016;9:301.
- 48
- 49 21 Cohen O, Kahan E, Zalewski S, et al. Medical investigations requested by patients: how do  
50 primary care physicians react? *Fam Med* 1999;31:426–31.
- 51
- 52 22 Yagil D, Medler-Liraz H. Clinical Expert or Service Provider? Physicians' Identity Work in the  
53 Context of Counterprofessional Patient Requests. *Qual Health Res* 2015;25:1199–211.
- 54 23 Fenton JJ, Franks P, Feldman MD, et al. Impact of patient requests on provider-perceived  
55 visit difficulty in primary care. *J Gen Intern Med* 2015;30:214–20.
- 56
- 57
- 58
- 59
- 60

- 1  
2  
3 24 Sabbatini AK, Tilburt JC, Campbell EG, et al. Controlling Health Costs: Physician Responses to  
4 Patient Expectations for Medical Care. *J Gen Intern Med* 2014;29:1234–41. doi:  
5 10.1007/s11606-014-2898-6
- 6 25 Alber K, Kuehlein T, Schedlbauer A, et al. Medical overuse and quaternary prevention in  
7 primary care - A qualitative study with general practitioners. *BMC Fam Pract* 2017;18:99. doi:  
8 10.1186/s12875-017-0667-4.
- 9  
10 26 Zikmund-Fisher BJ, Kullgren JT, Fagerlin A, et al. Perceived Barriers to Implementing  
11 Individual Choosing Wisely® Recommendations in Two National Surveys of Primary Care  
12 Providers. *J Gen Intern Med* 2017;32:210–7.
- 13 27 Wammes JJ, Jeurissen PP, Verhoef LM, et al. Is the role as gatekeeper still feasible? A survey  
14 among Dutch general practitioners. *Fam Pract* 2014;31:538–44.
- 15  
16 28 Ministerio de Sanidad. La salud y el sistema sanitario en 100 tablas. Available from:  
17 <https://www.msssi.gob.es/estadEstudios/estadisticas/sisInfSanSNS/tablasEstadisticas/SaludSis>  
18 [temaSanitario\\_100\\_Tablas1.pdf](https://www.msssi.gob.es/estadEstudios/estadisticas/sisInfSanSNS/tablasEstadisticas/SaludSis) (accessed 26 Jun 2017).
- 19  
20 29 Domínguez-Aurrecochea B, Valdivia-Jiménez C. Radiografía de la Pediatría de Atención  
21 Primaria española: nuestro espacio en el Sistema Nacional de Salud. *Rev Pediatr Aten Primaria*  
22 2011;13:59–70.
- 23 30 Ministerio de Sanidad, Servicios Sociales e Igualdad. SIAP - Estadísticas de Población,  
24 Recursos y Actividad. Aplicación interactiva, año 2016 [Internet]. Available  
25 from: <http://pestadistico.inteligenciadegestion.msssi.es/publicoSNS/comun/Cubo.aspx?IdNodo=6407#no-back-button> (accessed 31 Jul 2017).
- 26  
27  
28 31 Ministerio de Sanidad, Servicios Sociales e Igualdad. SIAP - Estadísticas de Población,  
29 Recursos y Actividad. Aplicación interactiva, año 2016 [Internet]. Available  
30 from: <http://pestadistico.inteligenciadegestion.msssi.es/publicoSNS/comun/Cubo.aspx?IdNodo=6407#no-back-button> (accessed 31 Jul 2017).
- 31  
32  
33 32 Mira JJ, Martínez-Jimeno L, Orozco-Beltrán D, et al. What older complex chronic patients  
34 need to know about their everyday medication for safe drug use. *Expert Opin Drug Saf*  
35 2014;13:713–21.
- 36 33 Colla CH, Kinsella EA, Morden NE, et al. Physician Perceptions of Choosing Wisely and  
37 Drivers of Overuse. *Am J Manag Care* 2016;22:337–43.
- 38  
39 34 Kaul S, Kirchhoff AC, Morden NE, et al. Physician Response to Patient Request for  
40 Unnecessary Care. *Am J Manag Care* 2015;21:823–32.
- 41  
42 35 Jessen K, Søndergaard J, Larsen PV, et al. Danish General Practitioners' Use of Prostate-  
43 Specific Antigen in Opportunistic Screening for Prostate Cancer: A Survey Comprising 174 GPs.  
44 *Inter J Family Med* 2013;540707. <http://dx.doi.org/10.1155/2013/540707> (accessed 24 Jun  
45 2017).
- 46 36 Moro ML, Marchi M, Gagliotti C, et al. Why do paediatricians prescribe antibiotics? Results  
47 of an Italian regional project. *BMC Pediatr* 2009;9:69.
- 48  
49 37 Schoenthaler A, Albright G, Hibbard J, et al. Simulated Conversations With Virtual Humans  
50 to Improve Patient-Provider Communication and Reduce Unnecessary Prescriptions for  
51 Antibiotics: A Repeated Measure Pilot Study. *JMIR Med Educ* 2017;3:e7.
- 52  
53 38 Légaré F, Labrecque M, Cauchon M, et al. Training family physicians in shared decision-  
54 making to reduce the overuse of antibiotics in acute respiratory infections: a cluster  
55 randomized trial. *CMAJ* 2012;184:E726–34.
- 56  
57  
58  
59  
60

- 1  
2  
3 39 Zambrana-García JL, Lozano Rodríguez-Mancheño A. Actitudes de los médicos hacia el  
4 problema de las pruebas y los procedimientos innecesarios. *Gac Sanit* 2016;30:485–6.
- 5 40 Mira JJ, Nebot C, Lorenzo S, et al. Patient report on information given, consultation time  
6 and safety in primary care. *Qual Saf Health Care* 2010;19:e33.
- 7  
8 41 Griffith J, Monkman H, Borycki E, et al. Physician Experiences with Perceived Pressure to  
9 Order Diagnostic Imaging Services. *Stud Health Technol Inform* 2015;218:40591.
- 10 42 Rosenberg A, Agiro A, Gottlieb M, et al. Early Trends Among Seven Recommendations From  
11 the Choosing Wisely Campaign. *JAMA Intern Med* 2015;175:1913–20.
- 12  
13 43 Combs B, Caverly T. The Do No Harm Project. 2014; School of Medicine, Internal Medicine  
14 Residency Training Program, University of Colorado .Available  
15 from: [https://lowinstitute.org/wp-content/uploads/2014/05/The-Do-No-Harm-Project-Intro-](https://lowinstitute.org/wp-content/uploads/2014/05/The-Do-No-Harm-Project-Intro-Slides.pdf)  
16 [Slides.pdf](https://lowinstitute.org/wp-content/uploads/2014/05/The-Do-No-Harm-Project-Intro-Slides.pdf) (accessed 9 Jun 2017).
- 17  
18 44 Bonaldi A, Venero S. Italy's Slow Medicine: a new paradigm in medicine. *Recenti Prog Med*  
19 2015;106:85–91.
- 20 45 ABIM Foundation. Choosing Wisely [Internet]. Available from:  
21 <http://www.choosingwisely.org/> (accessed 24 Jun 2017).
- 22  
23 46 Mira JJ, Llinás G, Pérez-Jover V. Habits of Internet users and usefulness of websites in  
24 Spanish for health education. *World Hosp Health Serv*. 2008;44:30–5.
- 25  
26 47 Lorenzo S, Mira JJ. Are Spanish physicians ready to take advantage of the Internet? *World*  
27 *Hosp Health Serv* 2004;40:31–5.
- 28  
29  
30  
31  
32  
33  
34  
35  
36  
37  
38  
39  
40  
41  
42  
43  
44  
45  
46  
47  
48  
49  
50  
51  
52  
53  
54  
55  
56  
57  
58  
59  
60

**STROBE 2007 (v4) Statement—Checklist of items that should be included in reports of *cross-sectional studies***

| Section/Topic                | Item # | Recommendation                                                                                                                                                                       | Reported on page # |
|------------------------------|--------|--------------------------------------------------------------------------------------------------------------------------------------------------------------------------------------|--------------------|
| <b>Title and abstract</b>    | 1      | (a) Indicate the study's design with a commonly used term in the title or the abstract                                                                                               | 1                  |
|                              |        | (b) Provide in the abstract an informative and balanced summary of what was done and what was found                                                                                  | 1                  |
| <b>Introduction</b>          |        |                                                                                                                                                                                      |                    |
| Background/rationale         | 2      | Explain the scientific background and rationale for the investigation being reported                                                                                                 | 3                  |
| Objectives                   | 3      | State specific objectives, including any prespecified hypotheses                                                                                                                     | 3                  |
| <b>Methods</b>               |        |                                                                                                                                                                                      |                    |
| Study design                 | 4      | Present key elements of study design early in the paper                                                                                                                              | 3-4                |
| Setting                      | 5      | Describe the setting, locations, and relevant dates, including periods of recruitment, exposure, follow-up, and data collection                                                      | 3-4                |
| Participants                 | 6      | (a) Give the eligibility criteria, and the sources and methods of selection of participants                                                                                          | 3-4                |
| Variables                    | 7      | Clearly define all outcomes, exposures, predictors, potential confounders, and effect modifiers. Give diagnostic criteria, if applicable                                             | 4                  |
| Data sources/<br>measurement | 8*     | For each variable of interest, give sources of data and details of methods of assessment (measurement). Describe comparability of assessment methods if there is more than one group | 4                  |
| Bias                         | 9      | Describe any efforts to address potential sources of bias                                                                                                                            | 4                  |
| Study size                   | 10     | Explain how the study size was arrived at                                                                                                                                            | 4                  |
| Quantitative variables       | 11     | Explain how quantitative variables were handled in the analyses. If applicable, describe which groupings were chosen and why                                                         | 4                  |
| Statistical methods          | 12     | (a) Describe all statistical methods, including those used to control for confounding                                                                                                | 4                  |
|                              |        | (b) Describe any methods used to examine subgroups and interactions                                                                                                                  | 4                  |
|                              |        | (c) Explain how missing data were addressed                                                                                                                                          | 4                  |
|                              |        | (d) If applicable, describe analytical methods taking account of sampling strategy                                                                                                   | --                 |
|                              |        | (e) Describe any sensitivity analyses                                                                                                                                                | --                 |
| <b>Results</b>               |        |                                                                                                                                                                                      |                    |

|                          |     |                                                                                                                                                                                                              |         |
|--------------------------|-----|--------------------------------------------------------------------------------------------------------------------------------------------------------------------------------------------------------------|---------|
| Participants             | 13* | (a) Report numbers of individuals at each stage of study—eg numbers potentially eligible, examined for eligibility, confirmed eligible, included in the study, completing follow-up, and analysed            | 4-5     |
|                          |     | (b) Give reasons for non-participation at each stage                                                                                                                                                         | 4-5     |
|                          |     | (c) Consider use of a flow diagram                                                                                                                                                                           | --      |
| Descriptive data         | 14* | (a) Give characteristics of study participants (eg demographic, clinical, social) and information on exposures and potential confounders                                                                     | TABLE 1 |
|                          |     | (b) Indicate number of participants with missing data for each variable of interest                                                                                                                          | 12-16   |
| Outcome data             | 15* | Report numbers of outcome events or summary measures                                                                                                                                                         | 5-6     |
| Main results             | 16  | (a) Give unadjusted estimates and, if applicable, confounder-adjusted estimates and their precision (eg, 95% confidence interval). Make clear which confounders were adjusted for and why they were included | 5-6     |
|                          |     | (b) Report category boundaries when continuous variables were categorized                                                                                                                                    | 5-6     |
|                          |     | (c) If relevant, consider translating estimates of relative risk into absolute risk for a meaningful time period                                                                                             | --      |
| Other analyses           | 17  | Report other analyses done—eg analyses of subgroups and interactions, and sensitivity analyses                                                                                                               | --      |
| <b>Discussion</b>        |     |                                                                                                                                                                                                              |         |
| Key results              | 18  | Summarise key results with reference to study objectives                                                                                                                                                     | 7       |
| Limitations              | 19  | Discuss limitations of the study, taking into account sources of potential bias or imprecision. Discuss both direction and magnitude of any potential bias                                                   | 8       |
| Interpretation           | 20  | Give a cautious overall interpretation of results considering objectives, limitations, multiplicity of analyses, results from similar studies, and other relevant evidence                                   | 7-8     |
| Generalisability         | 21  | Discuss the generalisability (external validity) of the study results                                                                                                                                        | 9       |
| <b>Other information</b> |     |                                                                                                                                                                                                              |         |
| Funding                  | 22  | Give the source of funding and the role of the funders for the present study and, if applicable, for the original study on which the present article is based                                                | 10      |

\*Give information separately for cases and controls in case-control studies and, if applicable, for exposed and unexposed groups in cohort and cross-sectional studies.

**Note:** An Explanation and Elaboration article discusses each checklist item and gives methodological background and published examples of transparent reporting. The STROBE checklist is best used in conjunction with this article (freely available on the Web sites of PLoS Medicine at <http://www.plosmedicine.org/>, Annals of Internal Medicine at <http://www.annals.org/>, and Epidemiology at <http://www.epidem.com/>). Information on the STROBE Initiative is available at [www.strobe-statement.org](http://www.strobe-statement.org).

# BMJ Open

## Drivers and strategies for avoiding overuse. A cross-sectional study to explore the experience of Spanish primary care providers handling uncertainty and patients' requests

|                                 |                                                                                                                                                                                                                                                                                                                                                                                                                                                                                                                                                                                                                                                                                                                                                                                                                                                             |
|---------------------------------|-------------------------------------------------------------------------------------------------------------------------------------------------------------------------------------------------------------------------------------------------------------------------------------------------------------------------------------------------------------------------------------------------------------------------------------------------------------------------------------------------------------------------------------------------------------------------------------------------------------------------------------------------------------------------------------------------------------------------------------------------------------------------------------------------------------------------------------------------------------|
| Journal:                        | <i>BMJ Open</i>                                                                                                                                                                                                                                                                                                                                                                                                                                                                                                                                                                                                                                                                                                                                                                                                                                             |
| Manuscript ID                   | bmjopen-2017-021339.R1                                                                                                                                                                                                                                                                                                                                                                                                                                                                                                                                                                                                                                                                                                                                                                                                                                      |
| Article Type:                   | Research                                                                                                                                                                                                                                                                                                                                                                                                                                                                                                                                                                                                                                                                                                                                                                                                                                                    |
| Date Submitted by the Author:   | 02-Mar-2018                                                                                                                                                                                                                                                                                                                                                                                                                                                                                                                                                                                                                                                                                                                                                                                                                                                 |
| Complete List of Authors:       | Mira, José ; Universidad Miguel Hernández de Elche, Health Psychology; Salud Alicante-Sant Joan Health District, Carrillo, Irene; Universidad Miguel Hernández de Elche, Health Psychology Silvestre, Carmen; Servicio Navarro de Salud - Osasunbidea, Servicio de Efectividad y Seguridad Asistencial Pérez Pérez, Pastora; Agencia de Calidad Sanitaria de Andalucía, Patient Safety Observatory Nebot, Cristina; Generalitat Valenciana Conselleria de Sanitat, Dr. Peset Health District Olivera, Guadalupe; Comunidad de Madrid Servicio Madrilenio de Salud, Hospital Clínico San Carlos Gonzalez de Dios, Javier; Hospital General Universitari d'Alacant, Pediatric Department ARANAZ ANDRÉS , JESÚS MARIA; Hospital Universitario Ramon y Cajal, PREVENTIVE MEDICINE AND PUBLIC HEALTH; IRYCIS, INSTITUTO RAMÓN Y CAJAL DE INVESTIGACIÓN SANITARIA |
| <b>Primary Subject Heading</b>: | Health services research                                                                                                                                                                                                                                                                                                                                                                                                                                                                                                                                                                                                                                                                                                                                                                                                                                    |
| Secondary Subject Heading:      | Health services research, Health economics                                                                                                                                                                                                                                                                                                                                                                                                                                                                                                                                                                                                                                                                                                                                                                                                                  |
| Keywords:                       | Quality in health care < HEALTH SERVICES ADMINISTRATION & MANAGEMENT, PRIMARY CARE, Health & safety < HEALTH SERVICES ADMINISTRATION & MANAGEMENT                                                                                                                                                                                                                                                                                                                                                                                                                                                                                                                                                                                                                                                                                                           |
|                                 |                                                                                                                                                                                                                                                                                                                                                                                                                                                                                                                                                                                                                                                                                                                                                                                                                                                             |

SCHOLARONE™  
Manuscripts

**Drivers and strategies for avoiding overuse. A cross-sectional study to explore the experience of Spanish primary care providers handling uncertainty and patients' requests**

José Joaquín Mira<sup>1,2,3</sup>, Irene Carrillo<sup>2</sup>, Carmen Silvestre<sup>4</sup>, Pastora Pérez-Pérez<sup>5</sup>, Cristina Nebot<sup>6</sup>,  
Guadalupe Olivera<sup>7</sup>, Javier González de Dios<sup>8,9</sup>, Jesús Aranz<sup>10,11,12</sup>

<sup>1</sup>Salud Alicante-Sant Joan Health District. Alicante, Spain

<sup>2</sup>Universidad Miguel Hernández de Elche. Elche, Spain

<sup>3</sup>REDISEC, Red de Servicios de Salud Orientados a Enfermedades Crónicas

<sup>4</sup>Servicio de Efectividad y Seguridad Asistencial, Servicio Navarro de Salud-Osasunbidea. Pamplona, Spain

<sup>5</sup>Observatorio para la Seguridad del Paciente, Agencia de Calidad Sanitaria de Andalucía. Sevilla, Spain

<sup>6</sup>Dr. Peset Health District. Valencia, Spain

<sup>7</sup>Hospital Clínico San Carlos, Servicio Madrileño de Salud. Madrid, Spain

<sup>8</sup>Hospital General Universitario de Alicante. Alicante, Spain

<sup>9</sup>CIBER de Enfermedades Raras, U724. Alicante, Spain

<sup>10</sup>Hospital Universitario Ramón y Cajal. Madrid, Spain

<sup>11</sup>Instituto Ramón y Cajal de Investigación Sanitaria (IRYCIS), Madrid, Spain

<sup>12</sup>Centro de Investigación Biomédica en Red en Epidemiología y Salud Pública (CIBERESP), Spain

Corresponding author:

José Joaquín Mira

Universidad Miguel Hernández de Elche

Edificio Altamira

Avda. de la Universidad, s/n

03202 Elche (Alicante), Spain

jose.mira@umh.es

Telephone number: +34 966658984

Word

count:

4253



**ABSTRACT**

Objectives: Identify the sources of overuse from the point of view of the Spanish primary care professionals, and analyze the frequency of overuse due to pressure from patients in addition to the responses when professionals face these demands.

Design: A cross-sectional study was conducted.

Setting: Primary care in Spain.

Participants: A non-randomized sample of 2201 providers (general practitioners, pediatricians, and nurses) were recruited during the survey.

Primary and secondary outcome measures: The frequency, causes, and responsibility for overuse, the frequency that patients demand unnecessary tests or procedures, the profile of the most demanding patients, and arguments for dissuading the patient.

Results: In all, 936 general practitioners, 682 pediatricians, and 286 nurses replied (response rate 18.6%). Patient requests (67%) and defensive medicine (40%) were the most cited causes of overuse. Five hundred twenty-two (27%) received requests from their patients almost every day for unnecessary tests or procedures, and 132 (7%) recognized granting the requests. Persistence and aggressiveness by patients increased overuse ( $p<0.001$ ). The lack of time in consultation, and information about new medical advances and treatments that patients could find on printed and digital media contributed to the professional's inability to adequately counter this pressure by patients. Evidence and clinical safety were the arguments that dissuade patients from their requests the most ( $p<0.001$ ). Cost savings are not a convincing argument, above all for pediatricians ( $p<0.001$ ). General practitioners resisted more pressure from their patients ( $p<0.001$ ), while nurses admitted to carrying out more unnecessary procedures ( $p<0.001$ ).

Conclusion: Satisfying the patient and patient uncertainty about what should be done and defensive medicine practices explains overuse. Safety arguments are useful to dissuade patients from their requests.

**KEYWORDS**

Medical overuse; Physician stewardship; Cost-conscious care; Health care costs; Physician decision-making; Health literacy

**STRENGTHS AND LIMITATIONS OF THIS STUDY**

- The strengths of the present study include its large sample of providers working on an ample number of Spanish primary care health organizations. This sample included general practitioners, pediatricians, and nurses.
- Frequency and causes of overuse were analyzed beside the profile of the most demanding patients, and arguments to dissuade the patient.
- Although data are derived only from Spain, it is likely to be representative of the rest of the health systems where physicians are the gatekeeper.
- The study did not on a random selection of participants. A limited number of males in the cases of pediatrics and nursing were involved even though their number is proportional to that of their presence within these professional groups. The data correspond to a health model funded by taxes.

## **Drivers and strategies for avoiding overuse. A cross-sectional study to explore the experience of Spanish primary care providers handling uncertainty and patients' requests**

### **INTRODUCTION**

Among the causes of lack of quality are the incorrect use of diagnostic or therapeutic resources due to medical errors,[1-2] underuse,[3] and overuse.[4]

Overuse is understood as the provision of healthcare when lacking evidence or when the potential benefits from the procedure or treatment do not outweigh its risks.[5] Overuse of diagnostic and therapeutic resources is present in all specialties, all health systems,[4, 6] and at all care levels,[7] and it represents a threat to patient safety and the sustainability of health systems.[8] Reducing overuse in primary care is particularly relevant when the general practitioner is the gatekeeper of the health system. However, in many countries the actual pattern of overuse remains virtually unknown.[9]

### **Causes of overuse**

The immediate causes of overuse include [10-15] insufficient updating of knowledge by professionals, defensive medicine, the custom of doing things that have always been done, lack of time in consultation, inadequate incentives, influence by the pharmaceutical industry, and inadequate communication with patients. Patients requesting diagnostic tests [9, 16-17] or treatments based on personal beliefs or from information obtained by other patients or from the Internet [9, 18-19] have been also introduced as a cause of overuse.

Patients in primary care usually request diagnostic tests, referrals to specialists, and medications, more frequently antimicrobials and for reducing pain.[9, 20] These requests generate dissatisfaction and make professionals uncomfortable [21] because they call their clinical expertise into question,[22] and this affects the quality of the relationship with the patient. Primary care physicians accept and handle the relationship with the patient better in the case of requests for tests and referrals to specialists than when the patient requests certain medications.[23] However, they often manifest in a desire to fulfill their patients' expectations, increasing overuse.[24] Other drivers of medical overuse from a primary care perspective also includes the lack of communicative skills or medical work experience, insufficient time during consultation, and fear of malpractice.[9, 24-25]

### **Questions to be answered**

There is little research on the role of the patient and professional in overuse, and most of it has been carried out in the USA, which has an organizational environment different from the models based on a national health system.[11] The little data there are suggest that medical recommendations to reduce overuse are difficult to follow and difficult for patients to accept,[26] although research is needed to discern the profile of patients prone to accept or refuse these recommendations. It is hoped that the organizational model of the provision of healthcare has a direct influence on overuse. In the case of models where the primary care physician is the gatekeeper, one could expect greater pressure upon this professional.[27]

### **Objectives**

This study identified the sources of overuse from the point of view of Spanish primary care professionals, and analyzed the frequency of overuse due to pressure from patients in addition to the responses when professionals face these demands. Specifically, this study searched for answers to the following questions:

- Perceived causes and responsibility of overuse from the primary-care-front-line-providers.

- Patient profiles and their requests and responses from healthcare professionals and how they dissuade patients.

## METHOD

A cross-sectional study was conducted based on an online survey directed at a group of primary care professionals in Spain: general practitioners, nurses, and pediatricians. The field study took place between March and July 2017.

### Setting

In Spain, primary care provides stepped care based on the right care at the right place at the right time, balancing quality and costs. This system strengthens the gatekeeper role of general practitioners (and pediatricians in the case of children). They are the ones who make diagnostic and therapeutic decisions in every case, which includes the possibility of referrals to other specialists at hospitals.

Spanish territory is divided into health districts, and in turn, these are divided into health zones. Each zone contains a health center that is responsible for providing healthcare for that territorial demarcation, with general practitioners, pediatricians, and nurses. One health district attends to an average of some 250,000 residents. The composition of professionals on primary health teams varies depending upon the population of the health zone (ratio around 1300 residents per general practitioner [28] and 1029 residents between the ages of 0 and 14 per pediatrician).[29] The number of nurses is similar to that of general practitioners and pediatricians.[30]

### Materials

The scope of the survey was based on the instrument employed by the ABIM Foundation.[11] Seven blocks of questions were analyzed and 28 questions formulated. Specifically analyzed were the causes and responsibility of unnecessary overuse, tests or procedures demanded most by patients, the profile of the patient who insists upon these requests, the frequency of receiving requests and the frequency that the professional orders them, the arguments employed for dissuading the patient and the extent to which they succeed, the reactions by the patient to the professional's refusal. A pilot test on comprehending the questions was carried out with six professionals whose profiles were similar to those who participated in the study. Proposals for changes to the wording or response scales were incorporated into the final draft of the questions.

### Participants

A non-randomized sample of primary care providers was surveyed. To carry out this survey on a population of 63753 professionals (28294 general practitioners, 6251 pediatricians and 29208 nurses), a minimal sample of 2201 professionals from all groups (general practitioners, pediatricians, and nurses) was determined, considering a 1% error, a confidence level of 95%,  $p=q=0.50$  and a response rate of 20%.

The field study was conducted with collaboration by the health services of Andalucía, Aragón, Madrid, Navarra, and the Comunidad Valenciana, the Spanish Association of Primary Care Pediatrics (AEPap), the Spanish Society of Outpatient and Primary Care Pediatrics (SEPEAP), the Illustrious Official College of Physicians of Valencia, the Council of Nursing of the Valencian Community (CECOVA), and the Spanish Society of General and Family Practitioners (SEMG). These organizations invited their associates to participate in this study, and sent a total of 12787 emails (88% of the emails were expected to be opened). They explained the study's scope to each group of primary care givers, its voluntary nature and the guarantees for the

confidentiality of their responses, instructions on how to respond, and it provided a link to a Google Forms page where they could respond. A reminder to motivate responses was given.

### Non-eligible participants

The responses from professionals who indicated that they worked at hospitals or other centers different from primary care were excluded. Also, participants were excluded when three or more questions were not answered. Incomplete questionnaires were not considered during the statistical analysis.

### Patient and Public Involvement

Patients and public were not involved in this study.

### Potential sources of bias

The reasons why some professionals answered the survey and others did not could affect the meaning of their answers. A sampling error of 1% was defined to reduce its effect. A leading questions bias was controlled using validated questions, although this bias could not have been controlled at all, and some participants encouraged answers expected from the researcher.

### Statistical methods

The answers by physicians, pediatricians, and nurses were compared. Professional experience and gender were used to compare the responses of each group and to assess their trends. The opinions of these professionals working in the public or private sectors were compared.

Data analysis was completed using descriptive and inferential descriptive statistics, with chi-square and ANOVA to establish relationships between qualitative variables and between qualitative and quantitative variables, respectively. The overuse experience was distinguished by different types of providers. The null hypothesis was rejected when  $P < 0.05$ .

### Ethical approval

This study was assessed and approved by the Ethics Committee of Primary Care Research of the Valencian Community, Spain.

## RESULTS

In all, 2098 professionals provided complete responses (response rate 18.6%), achieving 95.3% of the expected responses. Of these, 194 indicated they were working in hospitals, so the responses from 1904 professionals (936 general practitioners, 682 pediatricians, and 286 nurses) (Table 1) were coded and analyzed. Most of these, 1190 (62.5%), were recruited by invitation from professional societies, and 714 (37.5%) were invited by their health services. There were 1816 (95.4%) working at health centers from the Spanish public health system, with the remainder either working in private health or practicing in both professional fields. Three-quarters of the sample ( $N=1432$ , 75.2%) had more than 15 years of professional experience. Males in pediatrics and nursing, in addition to the professionals from the private sector, were underrepresented in a manner similar to their proportion in the makeup of primary care in Spain.[30]

Table 1. Description of the sample of professionals whose responses were analyzed.

|                         | General practitioners<br>(N = 936) |     | Pediatricians<br>(N = 682) |     | Nurses<br>(N = 286) |   |
|-------------------------|------------------------------------|-----|----------------------------|-----|---------------------|---|
|                         | N                                  | %   | N                          | %   | N                   | % |
| Professional experience |                                    |     |                            |     |                     |   |
| ≤ 5 years               | 38                                 | 4.1 | 65                         | 9.5 | 20                  | 7 |

|                                                        |     |      |     |      |     |      |
|--------------------------------------------------------|-----|------|-----|------|-----|------|
| Between 6 and 15 years                                 | 142 | 15.2 | 166 | 24.3 | 41  | 14.3 |
| Between 16 and 29 years                                | 470 | 50.2 | 268 | 39.3 | 129 | 45.1 |
| More than 30 years                                     | 286 | 30.6 | 183 | 26.8 | 96  | 33.6 |
| Gender                                                 |     |      |     |      |     |      |
| Male                                                   | 429 | 45.8 | 196 | 28.7 | 60  | 21   |
| Female                                                 | 507 | 54.2 | 486 | 71.3 | 226 | 79   |
| Area of professional practice                          |     |      |     |      |     |      |
| Public system                                          | 892 | 95.3 | 638 | 93.5 | 286 | 100  |
| Private or both                                        | 44  | 4.7  | 44  | 6.5  | 0   | 0    |
| Belongs to (institution or organism)                   |     |      |     |      |     |      |
| Public health system                                   | 317 | 33.9 | 138 | 20.2 | 259 | 90.6 |
| CECOVA                                                 | --  | --   | --  | --   | 27  | 9.4  |
| SEMG                                                   | 464 | 49.6 | --  | --   | --  | --   |
| Illustrious Official College of Physicians of Valencia | 155 | 16.6 | 62  | 9.1  | --  | --   |
| AEPap                                                  | --  | --   | 280 | 41.1 | --  | --   |
| SEPEAP                                                 | --  | --   | 202 | 29.6 | --  | --   |

CECOVA - Council of Nursing of the Valencian Community  
 SEMG - Spanish Society of General and Family Practitioners  
 AEPap - Spanish Association of Primary Care Pediatrics  
 SEPEAP - Spanish Society of Outpatient and Primary Care Pediatrics

### Causes of overuse

The reasons that general practitioners and pediatricians gave as being more directly responsible for inappropriate overuse were patient (or guardian) insistence and the need to attain greater safety or control over the process (Table 2). Male general practitioners, compared to their female counterparts, showed a greater tendency to justify inappropriate overuse on the grounds of satisfying the patient ( $\chi^2=5.2$ ,  $p=0.024$ , percentage difference [PD]=6.1). As causes of overuse, less experienced general practitioners indicated following regulations ( $\chi^2=14.4$ ,  $p=0.002$ , PD=19.1), making the patient feel satisfied with the care received ( $\chi^2=11.0$ ,  $p=0.011$ , PD=21.2), and avoiding possible claims ( $\chi^2=8.6$ ,  $p=0.035$ , PD=14.8). When comparing the opinions of general practitioners who only worked within the public sector with those who worked in both those public and private, it was observed that the former tended to consider the lack of time in consultation as a reason for overuse more frequently ( $\chi^2=13.1$ ,  $p=0.001$ , PD=27.8). However, for the latter (with activities in both the public and private systems), avoiding a claim by patients was more important ( $\chi^2=21.2$ ,  $p=0.001$ , PD=27.9), and they more frequently considered that the practice guides they used as reference were obsolete ( $\chi^2=6.8$ ,  $p=0.009$ , PD=6.6). Pediatricians who combined activities in both sectors reported more frequently on the difficulties of dissuading the guardian and making him/her see that the procedures requested for the child were unnecessary ( $\chi^2=4.6$ ,  $p=0.037$ , PD=13.8). General practitioners ( $\chi^2=11.8$ ,  $p=0.001$ , PD=25.0) and pediatricians ( $\chi^2=5.9$ ,  $p=0.018$ , PD=18.7) who only worked in the public sector felt more pressured by patients than those who practiced in both sectors.

Table 2. Reasons for ordering an unnecessary test or carrying out an unnecessary medical procedure.

|  | General | Pediatricians | Total |
|--|---------|---------------|-------|
|--|---------|---------------|-------|

|                                                                                 | practitioners<br>(N = 936) |      | (N = 682) |      | (N = 1904) |      |
|---------------------------------------------------------------------------------|----------------------------|------|-----------|------|------------|------|
|                                                                                 | N                          | %    | N         | %    | N          | %    |
| Due to insistent pressure by the patient                                        | 627                        | 67   | 398       | 58.4 | 1025       | 63.3 |
| Due to lack of time for patient consultation                                    | 418                        | 44.7 | 198       | 29.0 | 616        | 38.1 |
| To gain greater control and safety of the case                                  | 359                        | 38.4 | 291       | 42.7 | 650        | 40.2 |
| Because I do not know how to make the patient understand that it is unnecessary | 262                        | 28.1 | 150       | 22.0 | 412        | 25.5 |
| To avoid a future demand                                                        | 200                        | 21.4 | 92        | 13.5 | 292        | 18.1 |
| To satisfy the patient                                                          | 196                        | 20.9 | 92        | 13.5 | 288        | 17.8 |
| To avoid a claim                                                                | 177                        | 18.9 | 80        | 11.7 | 257        | 15.9 |
| Out of respect for the patient's decisions                                      | 132                        | 14.1 | 130       | 19.1 | 262        | 16.2 |
| Due to the standard or custom of making the order in the area                   | 111                        | 11.9 | 21        | 3.1  | 132        | 8.2  |
| To carry out epidemiological or clinical studies                                | 19                         | 2.0  | 26        | 3.8  | 45         | 2.8  |
| Due to indications in obsolete guides                                           | 26                         | 2.8  | 19        | 2.8  | 45         | 2.8  |

### Responsibility for overuse

The responsibility for overuse was assigned to, in order, the patients' relatives, the mass media, the professionals themselves, health pages on the Internet, and defensive medicine practices (Table 3). Male professionals attributed the responsibility for overuse of resources due to pressure by patients more directly on health services senior management ( $F=4.3$ ,  $p=0.038$ ,  $CI\ 95\%=-0.01-0.53$ ). Those solely working in the public health system (as opposed to those who also worked in private practice) held the media ( $F=6.4$ ,  $p=0.011$ ,  $CI\ 95\%=0.20-1.52$ ) and patients' relatives ( $F=4.5$ ,  $p=0.03$ ,  $CI\ 95\%=-0.07-1.06$ ) more directly accountable. No cross-effects from the interaction of these variables were observed.

Table 3. Responsibility for overuse in the opinion of the professionals surveyed.

|                                                       | General Medicine<br>(N = 936) |     | Pediatrics<br>(N = 682) |     | Nursing<br>(N = 286) |     | Total   |     | F     | P-Value |
|-------------------------------------------------------|-------------------------------|-----|-------------------------|-----|----------------------|-----|---------|-----|-------|---------|
|                                                       | Average                       | SD  | Average                 | SD  | Average              | SD  | Average | SD  |       |         |
| Press, radio, and television                          | 7.6                           | 2.5 | 6.8                     | 2.6 | 7.0                  | 2.6 | 7.2     | 2.6 | 21.2  | 0.001   |
| Patients                                              | 7.5                           | 2.1 | 5.0                     | 3.3 | 7.7                  | 2.1 | 6.6     | 2.9 | 194.7 | 0.001   |
| Relatives of patients                                 | 7.5                           | 2.2 | 7.7                     | 2.2 | 7.8                  | 1.9 | 7.6     | 2.2 | 3.6   | 0.027   |
| Nurses/Physicians                                     | 7.0                           | 2.1 | 7.4                     | 2.2 | 6.7                  | 2.4 | 7.1     | 2.2 | 13.2  | 0.001   |
| Managers of Internet health platforms                 | 7.0                           | 2.6 | 6.3                     | 2.6 | 6.8                  | 2.4 | 6.8     | 2.6 | 14.8  | 0.001   |
| As a defensive measure against possible future claims | 6.8                           | 2.3 | 6.4                     | 2.4 | 7.4                  | 2.3 | 6.7     | 2.4 | 18.8  | 0.001   |

|                                                 |     |     |     |     |     |     |     |     |      |       |
|-------------------------------------------------|-----|-----|-----|-----|-----|-----|-----|-----|------|-------|
| Senior management of health systems             | 6.5 | 2.7 | 5.3 | 3.0 | 6.5 | 2.8 | 6.1 | 2.9 | 38.5 | 0.001 |
| Patient associations                            | 6.2 | 2.7 | 5.4 | 2.8 | 5.7 | 2.5 | 5.8 | 2.7 | 15.5 | 0.001 |
| Center directors                                | 5.4 | 2.8 | 4.4 | 2.9 | 6.0 | 2.8 | 5.1 | 2.9 | 37.1 | 0.001 |
| Directors or Coordinators of nursing/physicians | 4.7 | 2.8 | 4.2 | 2.8 | 5.9 | 2.7 | 4.7 | 2.8 | 39.3 | 0.001 |

Scale from 0 to 10, minimum and maximum responsibility, respectively.

### Pressure by patients and responses from professionals

Only 31 (1.6%) of those surveyed said that they had not received any requests from patients (more frequent among professionals with more than 15 years of experience), while 103 (5.4%) said that they received requests like these from patients every day (normally younger professionals). General practitioners were those who claimed to be under greater pressure to carry out unnecessary tests or procedures ( $\chi^2=88.8$ ,  $p<0.001$ ,  $PD=17.0$ ). However, it was the nurses who admitted to carrying out these types of unnecessary procedures more frequently; pediatrics did so the least ( $\chi^2=175.7$ ,  $p<0.001$ ,  $PD=12.3$ ) (Table 4).

Table 4. Pressure from patients and response by professionals.

|                                 | Patients (or their guardians) request unnecessary tests and procedures from you |      | You order/carry out unnecessary tests or procedures due to pressure from a patient (or guardian) |      | You convince the patient (or guardian) that it is unnecessary and can pose significant risk |      | The patient's response is negative, or even aggressive, when you refuse to carry out a procedure that the patient requests from you |      |                      |  |
|---------------------------------|---------------------------------------------------------------------------------|------|--------------------------------------------------------------------------------------------------|------|---------------------------------------------------------------------------------------------|------|-------------------------------------------------------------------------------------------------------------------------------------|------|----------------------|--|
|                                 | N                                                                               | %    | N                                                                                                | %    | N                                                                                           | %    | N                                                                                                                                   | %    |                      |  |
| General practitioners (N = 936) |                                                                                 |      |                                                                                                  |      |                                                                                             |      |                                                                                                                                     |      |                      |  |
| Never                           | 12                                                                              | 1.3  | 118                                                                                              | 12.6 | 55                                                                                          | 5.9  | 237                                                                                                                                 | 25.3 | Never                |  |
| Monthly                         | 192                                                                             | 20.5 | 463                                                                                              | 49.5 | 248                                                                                         | 26.5 | 400                                                                                                                                 | 42.7 | Sometimes            |  |
| Almost every week               | 396                                                                             | 42.3 | 271                                                                                              | 29.0 | 356                                                                                         | 38.0 | 168                                                                                                                                 | 17.9 | One-half of the time |  |
| Almost every day                | 260                                                                             | 27.8 | 69                                                                                               | 7.4  | 227                                                                                         | 24.3 | 92                                                                                                                                  | 9.8  | Most of the time     |  |
| Every day                       | 76                                                                              | 8.1  | 15                                                                                               | 1.6  | 50                                                                                          | 5.3  | 39                                                                                                                                  | 4.2  | All the time         |  |
| Pediatricians (N = 682)         |                                                                                 |      |                                                                                                  |      |                                                                                             |      |                                                                                                                                     |      |                      |  |
| Never                           | 9                                                                               | 1.3  | 188                                                                                              | 27.6 | 14                                                                                          | 2.1  | 231                                                                                                                                 | 33.9 | Never                |  |
| Monthly                         | 228                                                                             | 33.4 | 401                                                                                              | 58.8 | 182                                                                                         | 26.7 | 343                                                                                                                                 | 50.3 | Sometimes            |  |
| Almost every week               | 316                                                                             | 46.3 | 84                                                                                               | 12.3 | 262                                                                                         | 38.4 | 73                                                                                                                                  | 10.7 | One-half of the time |  |
| Almost every day                | 113                                                                             | 16.6 | 6                                                                                                | 0.9  | 188                                                                                         | 27.6 | 30                                                                                                                                  | 4.4  | Most of the time     |  |
| Every day                       | 16                                                                              | 2.3  | 3                                                                                                | 0.4  | 36                                                                                          | 5.3  | 5                                                                                                                                   | 0.7  | All the time         |  |
| Nurses (N = 286)                |                                                                                 |      |                                                                                                  |      |                                                                                             |      |                                                                                                                                     |      |                      |  |
|                                 | N                                                                               | %    | N                                                                                                | %    | N                                                                                           | %    | N                                                                                                                                   | %    |                      |  |

|                   |     |      |     |      |     |      |     |      |                      |
|-------------------|-----|------|-----|------|-----|------|-----|------|----------------------|
| Never             | 10  | 3.5  | 37  | 12.9 | 9   | 3.1  | 36  | 12.6 | Never                |
| Monthly           | 82  | 28.7 | 123 | 43.0 | 106 | 37.1 | 158 | 55.2 | Sometimes            |
| Almost every week | 137 | 47.9 | 87  | 30.4 | 71  | 24.8 | 36  | 12.6 | One-half of the time |
| Almost every day  | 46  | 16.1 | 31  | 10.8 | 92  | 32.2 | 54  | 18.9 | Most of the time     |
| Every day         | 11  | 3.8  | 8   | 2.8  | 8.0 | 2.8  | 2   | 0.7  | All the time         |

The physicians who reported receiving requests from patients for unnecessary tests or procedures more frequently were those who acknowledged either ordering tests (every day or almost every day) for them or carrying out unnecessary procedures themselves for patients ( $\chi^2=419.0$ ,  $p<0.001$ , PD = 16.8). They also stated that the reaction by the patient (or guardian) when a request for tests or procedures was denied was more negative or aggressive ( $\chi^2=247.7$ ,  $p<0.001$ , PD = 20.1).

Male nurses, compared to their female counterparts, reported greater pressure from patients to carry out unnecessary procedures ( $\chi^2=14.8$ ,  $p=0.005$ , PD=12.7) and, compared with the females, carried out these unnecessary procedures more frequently ( $\chi^2=14.1$ ,  $p=0.007$ , PD=10.2). The ability to dissuade patient requests was similar in men and women in all three professional profiles. However, male nurses, compared to those female, reported receiving an aggressive response more frequently ( $\chi^2=13.6$ ,  $p=0.009$ , PD=11.1).

Pediatricians with less than 5 years of experience reported receiving requests for unnecessary tests or procedures most frequently ( $\chi^2=52.6$ ,  $p<0.001$ , PD=21.3). Pediatricians who had practiced fewer years stated that when refusing a patient's request, the patient's reaction was frequently more negative or even aggressive in comparison to their more experienced colleagues ( $\chi^2=68.4$ ,  $p<0.001$ , PD=6.5).

### What patients request

The most frequent requests from patients were for routine analytical examinations, referrals to specialists, antimicrobial treatments, radiological studies, and requests for healing materials without indication (Table 5). The profile of the patient who requested unnecessary nursing procedures the most corresponded to that of a woman (145, 50.7%) over 66 years of age (158, 55.2%) who suffered various chronic conditions (154, 53.8%). In the case of general practitioners, these were usually women (604, 64.5%) between 51 and 65 years of age (411, 43.9%) with a low prevalence pathology (296, 31.6%) or one that was unspecified (219, 23.4%) and who consulted the Internet about their concerns (172, 18.4%). In pediatrics, the profile of the guardian who most persistently requested unnecessary tests or procedures corresponded to the mother of a patient (480, 70.4%) who suffered an unspecified pathology (367, 53.8%) and who usually sought information on health webpages (130, 19.1%).

Table 5. Unnecessary tests and procedures patients usually request.

| General practitioners (N = 936)                                       | N   | %    | Pediatricians (N = 682)                                            | N   | %    | Nurses (N = 286)                                                | N   | %    |
|-----------------------------------------------------------------------|-----|------|--------------------------------------------------------------------|-----|------|-----------------------------------------------------------------|-----|------|
| Routine checkup analysis                                              | 709 | 75.7 | Routine checkup analysis                                           | 510 | 74.8 | Taking vital signs                                              | 225 | 78.7 |
| Referrals to specialists without any concerning features <sup>§</sup> | 628 | 67.1 | Administration of antibiotics when is not recommended <sup>§</sup> | 491 | 72.0 | Administration of treatment that does not require professionals | 175 | 61.2 |



|                                                                    |     |      |                                                                             |     |      |                                                                                         |    |      |
|--------------------------------------------------------------------|-----|------|-----------------------------------------------------------------------------|-----|------|-----------------------------------------------------------------------------------------|----|------|
| Radiological studies without any concerning features <sup>§</sup>  | 570 | 60.9 | Referrals to other specialists without any concerning features <sup>§</sup> | 450 | 66.0 | Delivery of healing materials without indication                                        | 84 | 29.4 |
| Magnetic Resonance without any concerning features <sup>§</sup>    | 380 | 40.6 | Radiological studies without any concerning features <sup>§</sup>           | 197 | 28.9 | Delivery of glucometer without the patient having started hypoglycemia treatment        | 72 | 25.2 |
| PSA* in asymptomatic patients                                      | 358 | 38.2 |                                                                             |     |      | Administer vaccinations outside the vaccine calendar without indication by pediatrician | 34 | 11.9 |
| Administration of antibiotics when is not recommended <sup>§</sup> | 348 | 37.2 |                                                                             |     |      |                                                                                         |    |      |
| Computed Tomography when is not recommended <sup>§</sup>           | 280 | 29.9 |                                                                             |     |      |                                                                                         |    |      |

\*PSA - prostate-specific antigen

<sup>§</sup>following Do not DO Recommendations from Grupo de trabajo de la SEMFyC para el proyecto Recomendaciones «NO HACER». Recomendaciones NO HACER. Barcelona: SEMFyC ediciones, 2014, and Asociación Española de Pediatría (AEP). Recomendaciones de “no hacer” en Pediatría. 2014 [consultado 24-06-2017]: Available in: <http://www.aeped.es/documentos/recomendaciones-no-hacer-en-pediatria>

### Ideas that work to dissuade the patient

According to the majority of those surveyed, the arguments that worked best for dissuading the patient or guardian that the request was inadequate were clinical reasons and for patient safety (Table 6). The safety of ( $\chi^2=31.7$ ,  $p<0.001$ , PD=8.5) and avoiding discomfort in the child ( $\chi^2=57.7$ ,  $p<0.001$ , PD=10.0) were considered more effective arguments, above all for pediatricians. Cost savings was the least effective argument for pediatricians ( $\chi^2=43.9$ ,  $p<0.001$ , PD=6.9), while avoiding patient discomfort was least effective for general practitioners ( $\chi^2=57.7$ ,  $p<0.001$ ). For more experienced pediatricians ( $\chi^2=30.6$ ,  $p=0.002$ , PD=17.0) and nurses ( $\chi^2=23.6$ ,  $p=0.023$ , PD=28.8), arguing clinical reasons to dissuade the patient or guardian's request worked better.

Table 6. Degree of effectiveness as reported by the professionals about the arguments for convincing the patient that the treatment or procedure is unnecessary.

| Argument                                   | General practitioners<br>N = 936 |      | Pediatricians<br>N = 682 |      | Nurses<br>N = 286 |      | Total<br>N = 1904 |      | Chi <sup>2</sup> | P-Value= |
|--------------------------------------------|----------------------------------|------|--------------------------|------|-------------------|------|-------------------|------|------------------|----------|
|                                            | N                                | %    | N                        | %    | N                 | %    | N                 | %    |                  |          |
| Patient safety                             | 361                              | 60.8 | 311                      | 73.5 | 106               | 57.0 | 778               | 64.7 | 23.3             | 0.000    |
| Clinical reasons based on knowledge        | 352                              | 58.3 | 297                      | 66.1 | 102               | 55.1 | 751               | 60.7 | 9.5              | 0.009    |
| The result is achieved by other procedures | 320                              | 56.5 | 254                      | 61.8 | 91                | 50.3 | 665               | 57.4 | 7.2              | 0.028    |

|                                                                    |     |      |     |      |    |      |     |      |      |       |
|--------------------------------------------------------------------|-----|------|-----|------|----|------|-----|------|------|-------|
| Saves patient discomfort                                           | 119 | 18.4 | 144 | 33.6 | 65 | 32.7 | 328 | 25.8 | 36.9 | 0.000 |
| Saves time and money that have a positive effect on other patients | 68  | 8.6  | 29  | 4.8  | 32 | 14.0 | 129 | 8.0  | 20.0 | 0.000 |

*High and Very High degrees of effectiveness shown*

Pediatricians were more successful than general practitioners and nurses at dissuading their patient that the requested test or procedure was unnecessary or that it posed unnecessary risk ( $\chi^2=45.0$ ,  $p<0.001$ ,  $PD=5.4$ ). Nurses reported more frequently that the patient's reaction to a request being refused due to being unnecessary was either negative or aggressive ( $\chi^2=129.5$ ,  $p<0.001$ ,  $PD=14.4$ ). Men and women from all three professional profiles expressed a similar ability for dissuading a patient's request. Less experienced pediatricians stated they were able to dissuade patients more frequently than other pediatricians ( $\chi^2=23.9$ ,  $p=0.021$ ,  $PD=12.4$ ).

Patients who requested healing materials to take home (24/48,  $\chi^2=15.2$ ,  $p=0.004$ ,  $PD=14.4$ ), vaccinations outside the vaccine calendar (11/34,  $\chi^2=10.1$ ,  $p=0.039$ ,  $PD=14.5$ ), and antibiotic treatments (31/491,  $\chi^2=33.4$ ,  $p<0.001$ ,  $PD=4.2$ ) were those who, in the opinion of the professionals surveyed, were least willing to accept explanations and refusals by the professionals for their request.

According to 1231 (64.7%) of those surveyed, an educational campaign directed at the population would help reduce the number of requests for unnecessary tests and procedures by patients. Such a campaign was seen as most useful by general practitioners (general practitioners, 8.0, SD 2.1, CI 95% 7.9-8.0; pediatricians, 7.7, SD 2.0, CI 95% 7.6-7.9; nurses, 7.7, SD 2.0; CI 95% 7.6-7.8).

## DISCUSSION

The results of this study confirm the role that patients' requests and defensive medicine play in overuse. In this study, female patients and patients who suffer an unspecified or yet-undiagnosed pathology exerted greater pressure upon the professionals. For the former group, and in order to interpret this result, it needs to be taken into consideration that in many European countries females frequently accompany the patient in the consultation (adult or minor).[31] As for the latter case, one needs to consider that in addition to the fears the very patient experiences due to the uncertainty of not knowing what is happening to him/her, there is added pressure from family members, the effect from consulting health news on the Internet, and news from the printed and digital media about medical advances and new techniques.

In this case, it has been proven that overuse also has roots in the insecurity that an ill-defined pathology instills within the professional, the fear of an uncertain outcome for the indicated treatment, as well as the potential effects from a subsequent complaint by the patient or a lawsuit filed in a court of law. If we take into account the lack of a diagnosis, and then to it add on the lack of time in consultation and the need for greater security for the very professional, we find another of the main causes of overuse.[31] Curiously enough, these results show that as requests from patients become more insistent, for example vaccinating a minor outside the vaccine calendar, an antibiotic when it is contraindicated, or giving healing materials to the patient so he/she can take them home, the response from these patients is more negative. Both of these results could support the opinions of those surveyed about the usefulness of carrying out an educational campaign among the population [32] and the measures that have been adopted to prevent aggression towards professionals.

1  
2  
3 Previous research had found that, when compared to other specialties, general practitioners  
4 were under greater pressure by their patients for unnecessary medical tests or procedures to  
5 be carried out on them.[33] The fact that patients in primary care exert greater pressure than  
6 in hospitals is observed in both organizational models of payment for medical acts as well as in  
7 systems where the physician is the gatekeeper.[27, 33-34] These results should be interpreted  
8 keeping in mind the assessment that patients give about both care levels in every country and  
9 the belief that super specialization might be a key to quality medicine.

10 The frequency of requests for medical tests or procedures in the study by Zambrana & Lozano  
11 [35] in Spanish hospitals exceeded the frequency of requests that physicians in American  
12 hospitals reported by 16 percentage points. In this study in primary care, the frequency that  
13 general practitioners said they receive requests from their patients was 38 percentage points  
14 higher than what American physicians reported (78% versus 40%). The tendency in published  
15 figures of overuse from organizational models of primary care similar to that of the Spanish  
16 model [27] point in a similar direction, and suggests the gatekeeper's implication could not  
17 prevent (or at least reduce) overuse. Moreover, this debate remains open because other  
18 studies conducted in the USA [34] indicate that overuse in the wake of patient requests is  
19 similar at health centers in both wealthy areas and others with lower income levels.

20  
21 This study's findings reveal that as pressure from patients becomes more insistent, the  
22 professionals either order or carry out a greater number of unnecessary test and procedures,  
23 extending the initial observations that general practitioners tend to accept requests from their  
24 patients more so than other specialists [34]. General practitioners are pressured more by their  
25 patients than pediatricians or nurses, although the latter are those who carry out unnecessary  
26 procedures more frequently, probably because this group acknowledges being on the  
27 receiving end of more aggressive responses from patients when turning down requests.  
28 Nevertheless, these results should be qualified based on the request the patient makes and by  
29 the dissemination of practice guides between professionals. It is unlikely that ordering a test  
30 such as the prostate-specific antigen test (PSA) in an asymptomatic male who insists so he can  
31 "rest easy" is the same as initiating a totally contraindicated treatment and one that poses  
32 risks for the patient. Most physicians accept the first situation more easily,[36] but resist the  
33 second.[23, 31]

34  
35 Although professionals are directly responsible for overuse, and this and other research  
36 recognize this as such,[27, 33] we must also consider the role that patient associations,  
37 accreditation systems of websites, and associations of health news informers could play to  
38 succeed, among everybody, in reducing overuse figures. Ignorance on behalf of the population  
39 has been analyzed in other research, especially that regarding the use of therapies and  
40 requests for diagnostic imaging tests irrespective of the risk from the ionizing radiation  
41 involved.[37]

42  
43 Information does not always contribute to fulfill these recommendations.[26] However,  
44 providing the patient with clear and direct information about the clinical and safety reasons  
45 that advise against carrying out certain tests or starting certain treatments contributes to  
46 reducing overuse.[38-39] These results follow this line and confirm findings from research  
47 conducted in other countries where primary care physicians draw on evidence to dissuade a  
48 patient's request for a certain diagnostic test when they deem it unnecessary.[23] The other  
49 argument that has also demonstrated its usefulness for dissuading the patient is safety, above  
50 all for pediatricians. Considering the Spanish study with hospital physicians,[35] the  
51 effectiveness of general practitioners and pediatricians in dissuading patients is similar to that  
52 of their colleagues at hospitals. The pediatricians in this study did not report a dissuasive  
53 capacity any different from that of their colleagues who care for adults.  
54  
55  
56  
57  
58  
59

1  
2  
3 The professionals who fail to dissuade patients from their requests feel as if they are under  
4 greater pressure, they end up carrying out more unnecessary tests and procedures, and they  
5 also perceive more aggressive responses from their patients when refusing to carry out any of  
6 their requests. Although we do know that the lack of time in consultation has a negative effect  
7 on clinical safety,[32] these data do not permit us to determine whether the ability to dissuade  
8 patients from their requests might be different if more time were dedicated per patient. For a  
9 significant portion of physicians, and for those surveyed in this study as well, maintaining a  
10 positive relationship with the patient was essential,[25, 27] probably because it is one of the  
11 basic therapeutic resources in primary care.[40] Not responding to a request or not knowing  
12 how to dissuade the patient muddies the relationship. Furthermore, when the patient  
13 questions the physician's clinical expertise, their relationship worsens and defensive medicine  
14 tends to increase.[4, 8]

15  
16 The frequency of overuse resulting from movements grouped together under the "Less is  
17 More Medicine" label [41] has begun to be studied systematically, and various campaigns have  
18 been launched to raise awareness in professionals about what must not be done,[42-44] but  
19 studies analyzing the roles of patients and professionals in overuse and the impact from  
20 campaigns to reduce overuse directed at the population are still scarce. Furthermore,  
21 campaigns for reducing overuse in the style of Choosing Wisely [44] confirm the need to  
22 influence health education, but also directed especially at drawing attention to the risks from  
23 interpreting health websites without the appropriate information, like, for example,  
24 considering their latest update, sources of information, and the commitment to the quality of  
25 their contents,[45] and reducing the negative impact that these sources of information are  
26 beginning to have on the relationship between patients and professionals.[14, 46] This is also  
27 true in the case of publicly financed health systems, to carry out campaigns to fortify solidarity  
28 behavior and properly use diagnostic and therapeutic resources.

### 30 **Practical implications**

31 These results have direct implications on the professional level. First, fostering training in  
32 communication skills, highlighting how to approach communication with a patient who applies  
33 pressure to receive an unnecessary and/or harmful test or treatment for him or herself. For  
34 example, by promoting the so-called web prescription by recommending safe sites to patients  
35 where they can become informed, an aspect in which Spain lags somewhat behind.[46]  
36 Second, establishing a framework of greater legal security for professionals who act in  
37 accordance with practice guides. Third, identifying if Do not Do has a higher chance to produce  
38 an adverse event to define it as a target in a public campaign to reduce patients requests.

39  
40 On the health organization level, these results reinforce the need to establish the  
41 implementation in primary care of up-to-date practice guides and to establish alerts and  
42 assistance algorithms (including safety arguments for patients) on the ordering of tests,  
43 referrals, and prescriptions for limiting overuse. The lessons learned using decision aids to  
44 reduce more aggressive choices could be applied to design these algorithms.[47] Management  
45 indicators and annual or biennial targets could include indicators related to overuse, especially  
46 in those cases where, furthermore, the risk to patient safety increases.

### 48 **Generalizability**

49 These results and recommendations could be applied to the healthcare systems where the  
50 general practitioners (or pediatricians in the case of children) are the gatekeeper.

### 52 **Limitations**

53 This study was based on a non-random selection of participants. This sample included  
54 approximately 3% of the general practitioners, 11% of the pediatricians, and 1% of the nurses  
55 in terms of the total of healthcare professionals in Spanish primary care in 2016. Studies using  
56  
57  
58  
59

1  
2  
3 email and electronic questionnaires are frequent; however, some professionals might have  
4 considered that these systems would not guarantee their privacy and so decided not to  
5 answer. The willingness to respond could bias the sample selection, and in some other cases  
6 physicians or nurses might not admit to overuse. Although the public sector is  
7 overrepresented, this overrepresentation is also observed in the reference population. The  
8 limited number of males who answered in the cases of pediatrics and nursing limits the  
9 strengths of the comparisons, even though their number is proportional to that of their  
10 presence within these professional groups. The data correspond to a health model funded by  
11 taxes. Although the questionnaire was used in a previously study,[12] it has not been  
12 previously validated. This quantitative approach should be complemented with qualitative  
13 studies exploring experiences and coping styles to avoid overuse.

### 14 15 **Outlook**

16 Overuse is a challenge for health systems, particularly those where the general practitioner is  
17 the system gatekeeper, and it requires responses from both the clinical as well as economic  
18 points of view.  
19

### 20 21 **CONTRIBUTORS**

22 JJM and JMA-A conceived and designed the study. CS, PP-P, CN, OG, and JG acquired the data  
23 for the work. IC prepared the data, and together with JJM and JMA-A, conducted statistical  
24 analysis. All interpreted data for the work. JJM and IC prepared a first draft of the manuscript.  
25 All authors revised the paper critically for important intellectual content and approved the  
26 final version.  
27

### 28 29 **FUNDING**

30 This study was made possible by a grant from the European Regional Development Fund  
31 (ERDF) call for Health Research, reference PI16/00816.  
32

### 33 34 **COMPETING INTERESTS**

35 None.  
36

### 37 38 **DATA SHARING STATEMENT**

39 No additional data available.  
40

### 41 42 **ACKNOWLEDGEMENTS**

43 Involvement in the study by the health services and related organizations and institutions were  
44 indispensable for carrying out this study. We are grateful to the health services of Andalucía,  
45 Aragón, Madrid, Navarra, and Comunidad Valenciana, the Spanish Association of Primary Care  
46 Pediatrics (AEPap), Spanish Society of Outpatient and Primary Care Pediatrics (SEPEAP),  
47 Illustrious Official College of Physicians of Valencia, Council of Nursing of the Valencian  
48 Community (CECOVA), and the Spanish Society of General and Family Practitioners (SEMG).  
49

### 50 51 **REFERENCES**

- 1 Lainer M, Vögele A, Wensing M, et al. Improving medication safety in primary care. A review and consensus procedure by the LINNEAUS collaboration on patient safety in primary care. *Eur J Gen Pract* 2015;21 Suppl:14–8.
- 2 Hatoun J, Chan JA, Yaksic E, et al. A Systematic Review of Patient Safety Measures in Adult Primary Care. *Am J Med Qual* 2017;32:237–45.
- 3 Glasziou P, Straus S, Brownlee S, et al. Evidence for underuse of effective medical services around the world. *Lancet* 2017 8;390:169–77.
- 4 Morgan DJ, Wright SM, Dhruva S. Update on Medical Overuse. *JAMA Intern Med* 2015;175:120–4.
- 5 Chassin MR, Galvin RW. The urgent need to improve health care quality. Institute of Medicine National Roundtable on Health Care Quality. *JAMA* 1998;280:1000–05.
- 6 Brownlee S, Chalkidou K, Doust J, et al. Evidence for overuse of medical services around the world. *Lancet* 2017;390:156–68.
- 7 Schoen C, Osborn R, Squires D, et al. A Survey Of Primary Care Doctors In Ten Countries Shows Progress In Use Of Health Information Technology, Less In Other Areas. *Health Aff (Millwood)* 2012; 31:2805–16.
- 8 Panella M, Leigheb F, Rinaldi C, et al. Defensive Medicine: Defensive Medicine: Overview of the literature. *Ig Sanita Pubbl* 2015;71:335–51.
- 9 Selby K, Cornuz J, Cohidon C, et al. How do Swiss general practitioners agree with and report adhering to a top-five list of unnecessary tests and treatments? Results of a cross-sectional survey. *Eur J Gen Pract* 2017;1–7. doi: 10.1080/13814788.2017.1395018
- 10 Sirovich BE, Woloshin S, Schwartz LM. Too little? Too much? Primary care physicians' views on US health care: a brief report. *Arch Intern Med* 2011;171:1582–5.
- 11 PerryUndem Research/Communication. Unnecessary Tests and Procedures In the Health Care System: What Physicians Say About The Problem, the Causes, and the Solutions: Results from a National Survey of Physicians. ABIM Foundation; 2014 May.
- 12 Cummins RO. Clinicians' reasons for overuse of skull radiographs. *AJR Am Roentgenol* 1980;135:549–52.
- 13 Tilburt JC, Wynia MK, Sheeler RD, et al. Views of US physicians about controlling health care costs. *JAMA* 2013;310:380–8.
- 14 Mira JJ, Guilabert M, Pérez-Jover V, et al. Barriers for an effective communication around clinical decision making: an analysis of the gaps between doctors' and patients' point of view. *Health Expect* 2014;17:826–39.
- 15 Buist DSM. Primary Care Clinicians' Perspectives on Reducing Low-Value Care in an Integrated Delivery System. *Perm J* 2016;20:41–6.
- 16 Freudenberg LS, Beyer T. Subjective perception of radiation risk. *J Nucl Med* 2011;52 Suppl 2:29S–35S.
- 17 Kruger JF, Chen AH, Rybkin A, et al. Clinician perspectives on considering radiation exposure to patients when ordering imaging tests: a qualitative study. *BMJ Qual Saf* 2014;23:893–901.
- 18 Diaz, JA, Griffith RA, Ng JJ, et al. Patients' Use of the Internet for Medical Information. *J Gen Intern Med* 2002;17:180–5.
- 19 Mira JJ, Llinás G, Lorenzo S, et al. Uso de Internet por médicos de primaria y hospitales y percepción de cómo influye en su relación con los pacientes. *Aten Primaria* 2009;41:308–14.

- 1  
2  
3 20 Silverstein W, Lass E, Born K, et al. A survey of primary care patients' readiness to engage in  
4 the de-adoption practices recommended by Choosing Wisely Canada. *BMC Res Notes*  
5 2016;9:301.
- 6 21 Cohen O, Kahan E, Zalewski S, et al. Medical investigations requested by patients: how do  
7 primary care physicians react? *Fam Med* 1999;31:426–31.
- 8 22 Yagil D, Medler-Liraz H. Clinical Expert or Service Provider? Physicians' Identity Work in the  
9 Context of Counterprofessional Patient Requests. *Qual Health Res* 2015;25:1199–211.
- 10 23 Fenton JJ, Franks P, Feldman MD, et al. Impact of patient requests on provider-perceived  
11 visit difficulty in primary care. *J Gen Intern Med* 2015;30:214–20.
- 12 24 Sabbatini AK, Tilburt JC, Campbell EG, et al. Controlling Health Costs: Physician Responses to  
13 Patient Expectations for Medical Care. *J Gen Intern Med* 2014;29:1234–41. doi:  
14 10.1007/s11606-014-2898-6
- 15 25 Alber K, Kuehlein T, Schedlbauer A, et al. Medical overuse and quaternary prevention in  
16 primary care - A qualitative study with general practitioners. *BMC Fam Pract* 2017;18:99. doi:  
17 10.1186/s12875-017-0667-4.
- 18 26 Zikmund-Fisher BJ, Kullgren JT, Fagerlin A, et al. Perceived Barriers to Implementing  
19 Individual Choosing Wisely® Recommendations in Two National Surveys of Primary Care  
20 Providers. *J Gen Intern Med* 2017;32:210–7.
- 21 27 Wammes JJ, Jeurissen PP, Verhoef LM, et al. Is the role as gatekeeper still feasible? A survey  
22 among Dutch general practitioners. *Fam Pract* 2014;31:538–44.
- 23 28 Ministerio de Sanidad. La salud y el sistema sanitario en 100 tablas. Available from:  
24 <https://www.mssi.gob.es/estadEstudios/estadisticas/sisInfSanSNS/tablasEstadisticas/SaludSis>  
25 [temaSanitario\\_100\\_Tablas1.pdf](https://www.mssi.gob.es/estadEstudios/estadisticas/sisInfSanSNS/tablasEstadisticas/SaludSis) (accessed 26 Jun 2017).
- 26 29 Domínguez-Aurrecochea B, Valdivia-Jiménez C. Radiografía de la Pediatría de Atención  
27 Primaria española: nuestro espacio en el Sistema Nacional de Salud. *Rev Pediatr Aten Primaria*  
28 2011;13:59–70.
- 29 30 Ministerio de Sanidad, Servicios Sociales e Igualdad. SIAP - Estadísticas de Población,  
30 Recursos y Actividad. Aplicación interactiva, año 2016 [Internet]. Available  
31 from: <http://pestatistico.inteligenciadegestion.mssi.es/publicoSNS/comun/Cubo.aspx?IdNodo=6407#no-back-button>  
32 (accessed 31 Jul 2017).
- 33 31 Moro ML, Marchi M, Gagliotti C, et al. Why do paediatricians prescribe antibiotics? Results  
34 of an Italian regional project. *BMC Pediatr* 2009;9:69.
- 35 32 Mira JJ, Nebot C, Lorenzo S, et al. Patient report on information given, consultation time  
36 and safety in primary care. *Qual Saf Health Care* 2010;19:e33.
- 37 33 Colla CH, Kinsella EA, Morden NE, et al. Physician Perceptions of Choosing Wisely and  
38 Drivers of Overuse. *Am J Manag Care* 2016;22:337–43.
- 39 34 Kaul S, Kirchhoff AC, Morden NE, et al. Physician Response to Patient Request for  
40 Unnecessary Care. *Am J Manag Care* 2015;21:823–32.
- 41 35 Zambrana-García JL, Lozano Rodríguez-Mancheño A. Actitudes de los médicos hacia el  
42 problema de las pruebas y los procedimientos innecesarios. *Gac Sanit* 2016;30:485–6.
- 43 36 Jessen K, Søndergaard J, Larsen PV, et al. Danish General Practitioners' Use of Prostate-  
44 Specific Antigen in Opportunistic Screening for Prostate Cancer: A Survey Comprising 174 GPs.  
45 *Inter J Family Med* 2013;540707. <http://dx.doi.org/10.1155/2013/540707> (accessed 24 Jun  
46 2017).

- 1  
2  
3 37 Griffith J, Monkman H, Borycki E, et al. Physician Experiences with Perceived Pressure to  
4 Order Diagnostic Imaging Services. *Stud Health Technol Inform* 2015;218:40591.
- 5 38 Schoenthaler A, Albright G, Hibbard J, et al. Simulated Conversations With Virtual Humans  
6 to Improve Patient-Provider Communication and Reduce Unnecessary Prescriptions for  
7 Antibiotics: A Repeated Measure Pilot Study. *JMIR Med Educ* 2017;3:e7.
- 8  
9 39 Légaré F, Labrecque M, Cauchon M, et al. Training family physicians in shared decision-  
10 making to reduce the overuse of antibiotics in acute respiratory infections: a cluster  
11 randomized trial. *CMAJ* 2012;184:E726–34.
- 12  
13 40 Mira JJ, Martínez-Jimeno L, Orozco-Beltrán D, et al. What older complex chronic patients  
14 need to know about their everyday medication for safe drug use. *Expert Opin Drug Saf*  
15 2014;13:713–21.
- 16  
17 41 Rosenberg A, Agiro A, Gottlieb M, et al. Early Trends Among Seven Recommendations From  
18 the Choosing Wisely Campaign. *JAMA Intern Med* 2015;175:1913–20.
- 19  
20 42 Combs B, Caverly T. The Do No Harm Project. 2014; School of Medicine, Internal Medicine  
21 Residency Training Program, University of Colorado .Available  
22 from: [https://lowinstitute.org/wp-content/uploads/2014/05/The-Do-No-Harm-Project-Intro-  
23 Slides.pdf](https://lowinstitute.org/wp-content/uploads/2014/05/The-Do-No-Harm-Project-Intro-Slides.pdf) (accessed 9 Jun 2017).
- 24  
25 43 Bonaldi A, Vernerio S. Italy's Slow Medicine: a new paradigm in medicine. *Recenti Prog Med*  
26 2015;106:85–91.
- 27  
28 44 ABIM Foundation. Choosing Wisely [Internet]. Available from:  
29 <http://www.choosingwisely.org/> (accessed 24 Jun 2017).
- 30  
31 45 Mira JJ, Llinás G, Pérez-Jover V. Habits of Internet users and usefulness of websites in  
32 Spanish for health education. *World Hosp Health Serv*. 2008;44:30–5.
- 33  
34 46 Lorenzo S, Mira JJ. Are Spanish physicians ready to take advantage of the Internet? *World*  
35 *Hosp Health Serv* 2004;40:31–5.
- 36  
37 47 Stacey D, Légaré F, Col NF, et al. Decision aids for people facing health treatment or  
38 screening decisions. *Cochrane Database Syst Rev* 2017;4:CD001431. doi:  
39 10.1002/14651858.CD001431.pub5  
40  
41  
42  
43  
44  
45  
46  
47  
48  
49  
50  
51  
52  
53  
54  
55  
56  
57  
58  
59  
60



**STROBE 2007 (v4) Statement—Checklist of items that should be included in reports of *cross-sectional studies***

| Section/Topic                | Item # | Recommendation                                                                                                                                                                       | Reported on page # |
|------------------------------|--------|--------------------------------------------------------------------------------------------------------------------------------------------------------------------------------------|--------------------|
| Title and abstract           | 1      | (a) Indicate the study's design with a commonly used term in the title or the abstract                                                                                               | 1                  |
|                              |        | (b) Provide in the abstract an informative and balanced summary of what was done and what was found                                                                                  | 1                  |
| <b>Introduction</b>          |        |                                                                                                                                                                                      |                    |
| Background/rationale         | 2      | Explain the scientific background and rationale for the investigation being reported                                                                                                 | 3                  |
| Objectives                   | 3      | State specific objectives, including any prespecified hypotheses                                                                                                                     | 3                  |
| <b>Methods</b>               |        |                                                                                                                                                                                      |                    |
| Study design                 | 4      | Present key elements of study design early in the paper                                                                                                                              | 3-4                |
| Setting                      | 5      | Describe the setting, locations, and relevant dates, including periods of recruitment, exposure, follow-up, and data collection                                                      | 3-4                |
| Participants                 | 6      | (a) Give the eligibility criteria, and the sources and methods of selection of participants                                                                                          | 3-4                |
| Variables                    | 7      | Clearly define all outcomes, exposures, predictors, potential confounders, and effect modifiers. Give diagnostic criteria, if applicable                                             | 4                  |
| Data sources/<br>measurement | 8*     | For each variable of interest, give sources of data and details of methods of assessment (measurement). Describe comparability of assessment methods if there is more than one group | 4                  |
| Bias                         | 9      | Describe any efforts to address potential sources of bias                                                                                                                            | 4                  |
| Study size                   | 10     | Explain how the study size was arrived at                                                                                                                                            | 4                  |
| Quantitative variables       | 11     | Explain how quantitative variables were handled in the analyses. If applicable, describe which groupings were chosen and why                                                         | 4                  |
| Statistical methods          | 12     | (a) Describe all statistical methods, including those used to control for confounding                                                                                                | 4                  |
|                              |        | (b) Describe any methods used to examine subgroups and interactions                                                                                                                  | 4                  |
|                              |        | (c) Explain how missing data were addressed                                                                                                                                          | 4                  |
|                              |        | (d) If applicable, describe analytical methods taking account of sampling strategy                                                                                                   | --                 |
|                              |        | (e) Describe any sensitivity analyses                                                                                                                                                | --                 |
| <b>Results</b>               |        |                                                                                                                                                                                      |                    |

|                          |     |                                                                                                                                                                                                              |         |
|--------------------------|-----|--------------------------------------------------------------------------------------------------------------------------------------------------------------------------------------------------------------|---------|
| Participants             | 13* | (a) Report numbers of individuals at each stage of study—eg numbers potentially eligible, examined for eligibility, confirmed eligible, included in the study, completing follow-up, and analysed            | 4-5     |
|                          |     | (b) Give reasons for non-participation at each stage                                                                                                                                                         | 4-5     |
|                          |     | (c) Consider use of a flow diagram                                                                                                                                                                           | --      |
| Descriptive data         | 14* | (a) Give characteristics of study participants (eg demographic, clinical, social) and information on exposures and potential confounders                                                                     | TABLE 1 |
|                          |     | (b) Indicate number of participants with missing data for each variable of interest                                                                                                                          | 12-16   |
| Outcome data             | 15* | Report numbers of outcome events or summary measures                                                                                                                                                         | 5-6     |
| Main results             | 16  | (a) Give unadjusted estimates and, if applicable, confounder-adjusted estimates and their precision (eg, 95% confidence interval). Make clear which confounders were adjusted for and why they were included | 5-6     |
|                          |     | (b) Report category boundaries when continuous variables were categorized                                                                                                                                    | 5-6     |
|                          |     | (c) If relevant, consider translating estimates of relative risk into absolute risk for a meaningful time period                                                                                             | --      |
| Other analyses           | 17  | Report other analyses done—eg analyses of subgroups and interactions, and sensitivity analyses                                                                                                               | --      |
| <b>Discussion</b>        |     |                                                                                                                                                                                                              |         |
| Key results              | 18  | Summarise key results with reference to study objectives                                                                                                                                                     | 7       |
| Limitations              | 19  | Discuss limitations of the study, taking into account sources of potential bias or imprecision. Discuss both direction and magnitude of any potential bias                                                   | 8       |
| Interpretation           | 20  | Give a cautious overall interpretation of results considering objectives, limitations, multiplicity of analyses, results from similar studies, and other relevant evidence                                   | 7-8     |
| Generalisability         | 21  | Discuss the generalisability (external validity) of the study results                                                                                                                                        | 9       |
| <b>Other information</b> |     |                                                                                                                                                                                                              |         |
| Funding                  | 22  | Give the source of funding and the role of the funders for the present study and, if applicable, for the original study on which the present article is based                                                | 10      |

\*Give information separately for cases and controls in case-control studies and, if applicable, for exposed and unexposed groups in cohort and cross-sectional studies.

**Note:** An Explanation and Elaboration article discusses each checklist item and gives methodological background and published examples of transparent reporting. The STROBE checklist is best used in conjunction with this article (freely available on the Web sites of PLoS Medicine at <http://www.plosmedicine.org/>, Annals of Internal Medicine at <http://www.annals.org/>, and Epidemiology at <http://www.epidem.com/>). Information on the STROBE Initiative is available at [www.strobe-statement.org](http://www.strobe-statement.org).

# BMJ Open

## Drivers and strategies for avoiding overuse. A cross-sectional study to explore the experience of Spanish primary care providers handling uncertainty and patients' requests

|                                 |                                                                                                                                                                                                                                                                                                                                                                                                                                                                                                                                                                                                                                                                                                                                                                                                                                                             |
|---------------------------------|-------------------------------------------------------------------------------------------------------------------------------------------------------------------------------------------------------------------------------------------------------------------------------------------------------------------------------------------------------------------------------------------------------------------------------------------------------------------------------------------------------------------------------------------------------------------------------------------------------------------------------------------------------------------------------------------------------------------------------------------------------------------------------------------------------------------------------------------------------------|
| Journal:                        | <i>BMJ Open</i>                                                                                                                                                                                                                                                                                                                                                                                                                                                                                                                                                                                                                                                                                                                                                                                                                                             |
| Manuscript ID                   | bmjopen-2017-021339.R2                                                                                                                                                                                                                                                                                                                                                                                                                                                                                                                                                                                                                                                                                                                                                                                                                                      |
| Article Type:                   | Research                                                                                                                                                                                                                                                                                                                                                                                                                                                                                                                                                                                                                                                                                                                                                                                                                                                    |
| Date Submitted by the Author:   | 22-Apr-2018                                                                                                                                                                                                                                                                                                                                                                                                                                                                                                                                                                                                                                                                                                                                                                                                                                                 |
| Complete List of Authors:       | Mira, José ; Universidad Miguel Hernández de Elche, Health Psychology; Salud Alicante-Sant Joan Health District, Carrillo, Irene; Universidad Miguel Hernández de Elche, Health Psychology Silvestre, Carmen; Servicio Navarro de Salud - Osasunbidea, Servicio de Efectividad y Seguridad Asistencial Pérez Pérez, Pastora; Agencia de Calidad Sanitaria de Andalucía, Patient Safety Observatory Nebot, Cristina; Generalitat Valenciana Conselleria de Sanitat, Dr. Peset Health District Olivera, Guadalupe; Comunidad de Madrid Servicio Madrilenio de Salud, Hospital Clínico San Carlos Gonzalez de Dios, Javier; Hospital General Universitari d'Alacant, Pediatric Department ARANAZ ANDRÉS , JESÚS MARIA; Hospital Universitario Ramon y Cajal, PREVENTIVE MEDICINE AND PUBLIC HEALTH; IRYCIS, INSTITUTO RAMÓN Y CAJAL DE INVESTIGACIÓN SANITARIA |
| <b>Primary Subject Heading</b>: | Health services research                                                                                                                                                                                                                                                                                                                                                                                                                                                                                                                                                                                                                                                                                                                                                                                                                                    |
| Secondary Subject Heading:      | Health services research, Health economics                                                                                                                                                                                                                                                                                                                                                                                                                                                                                                                                                                                                                                                                                                                                                                                                                  |
| Keywords:                       | Quality in health care < HEALTH SERVICES ADMINISTRATION & MANAGEMENT, PRIMARY CARE, Health & safety < HEALTH SERVICES ADMINISTRATION & MANAGEMENT                                                                                                                                                                                                                                                                                                                                                                                                                                                                                                                                                                                                                                                                                                           |
|                                 |                                                                                                                                                                                                                                                                                                                                                                                                                                                                                                                                                                                                                                                                                                                                                                                                                                                             |

SCHOLARONE™  
Manuscripts

**Drivers and strategies for avoiding overuse. A cross-sectional study to explore the experience of Spanish primary care providers handling uncertainty and patients' requests**

José Joaquín Mira<sup>1,2,3</sup>, Irene Carrillo<sup>2</sup>, Carmen Silvestre<sup>4</sup>, Pastora Pérez-Pérez<sup>5</sup>, Cristina Nebot<sup>6</sup>,  
Guadalupe Olivera<sup>7</sup>, Javier González de Dios<sup>8,9</sup>, Jesús Aranz<sup>10,11,12</sup>

<sup>1</sup>Salud Alicante-Sant Joan Health District. Alicante, Spain

<sup>2</sup>Universidad Miguel Hernández de Elche. Elche, Spain

<sup>3</sup>REDISEC, Red de Servicios de Salud Orientados a Enfermedades Crónicas

<sup>4</sup>Servicio de Efectividad y Seguridad Asistencial, Servicio Navarro de Salud-Osasunbidea. Pamplona, Spain

<sup>5</sup>Observatorio para la Seguridad del Paciente, Agencia de Calidad Sanitaria de Andalucía. Sevilla, Spain

<sup>6</sup>Dr. Peset Health District. Valencia, Spain

<sup>7</sup>Hospital Clínico San Carlos, Servicio Madrileño de Salud. Madrid, Spain

<sup>8</sup>Hospital General Universitario de Alicante. Alicante, Spain

<sup>9</sup>CIBER de Enfermedades Raras, U724. Alicante, Spain

<sup>10</sup>Hospital Universitario Ramón y Cajal. Madrid, Spain

<sup>11</sup>Instituto Ramón y Cajal de Investigación Sanitaria (IRYCIS), Madrid, Spain

<sup>12</sup>Centro de Investigación Biomédica en Red en Epidemiología y Salud Pública (CIBERESP), Spain

Corresponding author:

José Joaquín Mira

Universidad Miguel Hernández de Elche

Edificio Altamira

Avda. de la Universidad, s/n

03202 Elche (Alicante), Spain

jose.mira@umh.es

Telephone number: +34 966658984

Word

count:

4253

## ABSTRACT

Objectives: Identify the sources of overuse from the point of view of the Spanish primary care professionals, and analyze the frequency of overuse due to pressure from patients in addition to the responses when professionals face these demands.

Design: A cross-sectional study was conducted.

Setting: Primary care in Spain.

Participants: A non-randomized sample of 2201 providers (general practitioners, pediatricians, and nurses) were recruited during the survey.

Primary and secondary outcome measures: The frequency, causes, and responsibility for overuse, the frequency that patients demand unnecessary tests or procedures, the profile of the most demanding patients, and arguments for dissuading the patient.

Results: In all, 936 general practitioners, 682 pediatricians, and 286 nurses replied (response rate 18.6%). Patient requests (67%) and defensive medicine (40%) were the most cited causes of overuse. Five hundred twenty-two (27%) received requests from their patients almost every day for unnecessary tests or procedures, and 132 (7%) recognized granting the requests. The lack of time in consultation, and information about new medical advances and treatments that patients could find on printed and digital media contributed to the professional's inability to adequately counter this pressure by patients. Clinical safety (49.9%) and evidence (39.4%) were the arguments that dissuade patients from their requests the most. Cost savings was not a convincing argument (6.8%), above all for pediatricians (4.3%). General practitioners resisted more pressure from their patients ( $\chi^2=88.8$ ,  $p<0.001$ ,  $PD=17.0$ ), while nurses admitted to carrying out more unnecessary procedures ( $\chi^2=175.7$ ,  $p<0.001$ ,  $PD=12.3$ ).

Conclusion: Satisfying the patient and patient uncertainty about what should be done and defensive medicine practices explains some of the frequent causes of overuse. Safety arguments are useful to dissuade patients from their requests.

## KEYWORDS

Medical overuse; Physician stewardship; Cost-conscious care; Health care costs; Physician decision-making; Health literacy

## STRENGTHS AND LIMITATIONS OF THIS STUDY

- The strengths of the present study include its large sample of providers working on an ample number of Spanish primary care health organizations. This sample included general practitioners, pediatricians, and nurses.
- Frequency and causes of overuse were analyzed beside the profile of the most demanding patients, and arguments to dissuade the patient.
- Although data are derived only from Spain, it is likely to be representative of the rest of the health systems where physicians are the gatekeeper.
- The study did not on a random selection of participants. A limited number of males in the cases of pediatrics and nursing were involved even though their number is proportional to that of their presence within these professional groups. The data correspond to a health model funded by taxes.

## **Drivers and strategies for avoiding overuse. A cross-sectional study to explore the experience of Spanish primary care providers handling uncertainty and patients' requests**

### **INTRODUCTION**

Among the causes of lack of quality are the incorrect use of diagnostic or therapeutic resources due to medical errors,[1-2] underuse,[3] and overuse.[4]

Overuse is understood as the provision of healthcare when lacking evidence or when the potential benefits from the procedure or treatment do not outweigh its risks.[5] Overuse of diagnostic and therapeutic resources is present in all specialties, all health systems,[4, 6] and at all care levels,[7] and it represents a threat to patient safety and the sustainability of health systems.[8] Reducing overuse in primary care is particularly relevant when the general practitioner is the gatekeeper of the health system. However, in many countries the actual pattern of overuse remains virtually unknown.[9]

### **Causes of overuse**

The immediate causes of overuse include [10-15] insufficient updating of knowledge by professionals, defensive medicine, the custom of doing things that have always been done, lack of time in consultation, inadequate incentives, influence by the pharmaceutical industry, and inadequate communication with patients. Patients requesting diagnostic tests [9, 16-17] or treatments based on personal beliefs or from information obtained by other patients or from the Internet [9, 18-19] have been also introduced as a cause of overuse.

Patients in primary care usually request diagnostic tests, referrals to specialists, and medications, more frequently antimicrobials and for reducing pain.[9, 20] These requests generate dissatisfaction and make professionals uncomfortable [21] because they call their clinical expertise into question,[22] and this affects the quality of the relationship with the patient. Primary care physicians accept and handle the relationship with the patient better in the case of requests for tests and referrals to specialists than when the patient requests certain medications.[23] However, they often manifest in a desire to fulfill their patients' expectations, increasing overuse.[24] Other drivers of medical overuse from a primary care perspective also includes the lack of communicative skills or medical work experience, insufficient time during consultation, and fear of malpractice.[9, 24-25]

### **Questions to be answered**

There is little research on the role of the patient and professional in overuse, and most of it has been carried out in the USA, which has an organizational environment different from the models based on a national health system.[11] The little data there are suggest that medical recommendations to reduce overuse are difficult to follow and difficult for patients to accept,[26] although research is needed to discern the profile of patients prone to accept or refuse these recommendations. It is hoped that the organizational model of the provision of healthcare has a direct influence on overuse. In the case of models where the primary care physician is the gatekeeper, one could expect greater pressure upon this professional.[27]

### **Objectives**

This study identified the sources of overuse from the point of view of Spanish primary care professionals, and analyzed the frequency of overuse due to pressure from patients in addition to the responses when professionals face these demands. Specifically, this study searched for answers to the following questions:

- Perceived causes and responsibility of overuse from the primary-care-front-line-providers.

- Patient profiles and their requests and responses from healthcare professionals and how they dissuade patients.

## METHOD

A cross-sectional study was conducted based on an online survey directed at a group of primary care professionals in Spain: general practitioners, nurses, and pediatricians. The field study took place between March and July 2017.

### Setting

In Spain, primary care provides stepped care based on the right care at the right place at the right time, balancing quality and costs. This system strengthens the gatekeeper role of general practitioners (and pediatricians in the case of children). They are the ones who make diagnostic and therapeutic decisions in every case, which includes the possibility of referrals to other specialists at hospitals.

Spanish territory is divided into health districts, and in turn, these are divided into health zones. Each zone contains a health center that is responsible for providing healthcare for that territorial demarcation, with general practitioners, pediatricians, and nurses. One health district attends to an average of some 250,000 residents. The composition of professionals on primary health teams varies depending upon the population of the health zone (ratio around 1300 residents per general practitioner [28] and 1029 residents between the ages of 0 and 14 per pediatrician).[29] The number of nurses is similar to that of general practitioners and pediatricians.[30]

### Materials

The scope of the survey was based on the instrument employed by the ABIM Foundation.[11] Seven blocks of questions were analyzed and 28 questions formulated. Specifically analyzed were the causes and responsibility of unnecessary overuse, tests or procedures demanded most by patients, the profile of the patient who insists upon these requests, the frequency of receiving requests and the frequency that the professional orders them, the arguments employed for dissuading the patient and the extent to which they succeed, the reactions by the patient to the professional's refusal. A pilot test on comprehending the questions was carried out with six professionals whose profiles were similar to those who participated in the study. Proposals for changes to the wording or response scales were incorporated into the final draft of the questions.

### Participants

A non-randomized sample of primary care providers was surveyed. To carry out this survey on a population of 63753 professionals (28294 general practitioners, 6251 pediatricians and 29208 nurses), a minimal sample of 2201 professionals from all groups (general practitioners, pediatricians, and nurses) was determined, considering a 1% error, a confidence level of 95%,  $p=q=0.50$  and a response rate of 20%.

The field study was conducted with collaboration by the health services of Andalucía, Aragón, Madrid, Navarra, and the Comunidad Valenciana, the Spanish Association of Primary Care Pediatrics (AEPap), the Spanish Society of Outpatient and Primary Care Pediatrics (SEPEAP), the Illustrious Official College of Physicians of Valencia, the Council of Nursing of the Valencian Community (CECOVA), and the Spanish Society of General and Family Practitioners (SEMIG). These organizations invited their associates to participate in this study, and sent a total of 12787 emails (88% of the emails were expected to be opened). They explained the study's scope to each group of primary care givers, its voluntary nature and the guarantees for the

confidentiality of their responses, instructions on how to respond, and it provided a link to a Google Forms page where they could respond. A reminder to motivate responses was given.

### Non-eligible participants

The responses from professionals who indicated that they worked at hospitals or other centers different from primary care were excluded. Also, participants were excluded when three or more questions were not answered. Incomplete questionnaires were not considered during the statistical analysis.

### Patient and Public Involvement

Patients and public were not involved in this study.

### Potential sources of bias

The reasons why some professionals answered the survey and others did not could affect the meaning of their answers. A sampling error of 1% was defined to reduce its effect.

### Statistical methods

The answers by physicians, pediatricians, and nurses were compared. Professional experience and gender were used to compare the responses of each group and to assess their trends. The opinions of these professionals working in the public or private sectors were compared.

Data analysis was completed using descriptive and inferential descriptive statistics, with chi-square and ANOVA to establish relationships between qualitative variables and between qualitative and quantitative variables, respectively. The overuse experience was distinguished by different types of providers. The null hypothesis was rejected when  $P < 0.05$ .

### Ethical approval

This study was assessed and approved by the Ethics Committee of Primary Care Research of the Valencian Community, Spain.

## RESULTS

In all, 2098 professionals provided complete responses (response rate 18.6%), achieving 95.3% of the expected responses. Of these, 194 indicated they were working in hospitals, so the responses from 1904 professionals (936 general practitioners, 682 pediatricians, and 286 nurses) (Table 1) were coded and analyzed. Most of these, 1190 (62.5%), were recruited by invitation from professional societies, and 714 (37.5%) were invited by their health services. There were 1816 (95.4%) working at health centers from the Spanish public health system, with the remainder either working in private health or practicing in both professional fields. Three-quarters of the sample ( $N=1432$ , 75.2%) had more than 15 years of professional experience. Males in pediatrics and nursing, in addition to the professionals from the private sector, were underrepresented in a manner similar to their proportion in the makeup of primary care in Spain.[30]

Table 1. Description of the sample of professionals whose responses were analyzed.

|                         | General practitioners<br>(N = 936) |      | Pediatricians<br>(N = 682) |      | Nurses<br>(N = 286) |      |
|-------------------------|------------------------------------|------|----------------------------|------|---------------------|------|
|                         | N                                  | %    | N                          | %    | N                   | %    |
| Professional experience |                                    |      |                            |      |                     |      |
| ≤ 5 years               | 38                                 | 4.1  | 65                         | 9.5  | 20                  | 7    |
| Between 6 and 15 years  | 142                                | 15.2 | 166                        | 24.3 | 41                  | 14.3 |
| Between 16 and 29 years | 470                                | 50.2 | 268                        | 39.3 | 129                 | 45.1 |



|                                                        |     |      |     |      |     |      |
|--------------------------------------------------------|-----|------|-----|------|-----|------|
| More than 30 years                                     | 286 | 30.6 | 183 | 26.8 | 96  | 33.6 |
| Gender                                                 |     |      |     |      |     |      |
| Male                                                   | 429 | 45.8 | 196 | 28.7 | 60  | 21   |
| Female                                                 | 507 | 54.2 | 486 | 71.3 | 226 | 79   |
| Area of professional practice                          |     |      |     |      |     |      |
| Public system                                          | 892 | 95.3 | 638 | 93.5 | 286 | 100  |
| Private or both                                        | 44  | 4.7  | 44  | 6.5  | 0   | 0    |
| Belongs to (institution or organism)                   |     |      |     |      |     |      |
| Public health system                                   | 317 | 33.9 | 138 | 20.2 | 259 | 90.6 |
| CECOVA                                                 | --  | --   | --  | --   | 27  | 9.4  |
| SEMG                                                   | 464 | 49.6 | --  | --   | --  | --   |
| Illustrious Official College of Physicians of Valencia | 155 | 16.6 | 62  | 9.1  | --  | --   |
| AEPap                                                  | --  | --   | 280 | 41.1 | --  | --   |
| SEPEAP                                                 | --  | --   | 202 | 29.6 | --  | --   |

CECOVA - Council of Nursing of the Valencian Community

SEMG - Spanish Society of General and Family Practitioners

AEPap - Spanish Association of Primary Care Pediatrics

SEPEAP - Spanish Society of Outpatient and Primary Care Pediatrics

### Causes of overuse

The reasons that general practitioners and pediatricians gave as being more directly responsible for inappropriate overuse were patient (or guardian) insistence and the need to attain greater safety or control over the process (Table 2). Male general practitioners, compared to their female counterparts, showed a greater tendency to justify inappropriate overuse on the grounds of satisfying the patient ( $\chi^2=5.2$ ,  $p=0.024$ , percentage difference [PD]=6.1). As causes of overuse, less experienced general practitioners indicated following regulations ( $\chi^2=14.4$ ,  $p=0.002$ , PD=19.1), making the patient feel satisfied with the care received ( $\chi^2=11.0$ ,  $p=0.011$ , PD=21.2), and avoiding possible claims ( $\chi^2=8.6$ ,  $p=0.035$ , PD=14.8). When comparing the opinions of general practitioners who only worked within the public sector with those who worked in both those public and private, it was observed that the former tended to consider the lack of time in consultation as a reason for overuse more frequently ( $\chi^2=13.1$ ,  $p=0.001$ , PD=27.8). However, for the latter (with activities in both the public and private systems), avoiding a claim by patients was more important ( $\chi^2=21.2$ ,  $p=0.001$ , PD=27.9), and they more frequently considered that the practice guides they used as reference were obsolete ( $\chi^2=6.8$ ,  $p=0.009$ , PD=6.6). Pediatricians who combined activities in both sectors reported more frequently on the difficulties of dissuading the guardian and making him/her see that the procedures requested for the child were unnecessary ( $\chi^2=4.6$ ,  $p=0.037$ , PD=13.8). General practitioners ( $\chi^2=11.8$ ,  $p=0.001$ , PD=25.0) and pediatricians ( $\chi^2=5.9$ ,  $p=0.018$ , PD=18.7) who only worked in the public sector felt more pressured by patients than those who practiced in both sectors.

Table 2. Reasons for ordering an unnecessary test or carrying out an unnecessary medical procedure.

|  | General practitioners (N = 936) |   | Pediatricians (N = 682) |   | Total (N = 1618) |   |
|--|---------------------------------|---|-------------------------|---|------------------|---|
|  | N                               | % | N                       | % | N                | % |
|  |                                 |   |                         |   |                  |   |

|                                                                                 |     |      |     |      |      |      |
|---------------------------------------------------------------------------------|-----|------|-----|------|------|------|
| Due to insistent pressure by the patient                                        | 627 | 67   | 398 | 58.4 | 1025 | 63.3 |
| Due to lack of time for patient consultation                                    | 418 | 44.7 | 198 | 29.0 | 616  | 38.1 |
| To gain greater control and safety of the case                                  | 359 | 38.4 | 291 | 42.7 | 650  | 40.2 |
| Because I do not know how to make the patient understand that it is unnecessary | 262 | 28.1 | 150 | 22.0 | 412  | 25.5 |
| To avoid a future demand                                                        | 200 | 21.4 | 92  | 13.5 | 292  | 18.1 |
| To satisfy the patient                                                          | 196 | 20.9 | 92  | 13.5 | 288  | 17.8 |
| To avoid a claim                                                                | 177 | 18.9 | 80  | 11.7 | 257  | 15.9 |
| Out of respect for the patient's decisions                                      | 132 | 14.1 | 130 | 19.1 | 262  | 16.2 |
| Due to the standard or custom of making the order in the area                   | 111 | 11.9 | 21  | 3.1  | 132  | 8.2  |
| To carry out epidemiological or clinical studies                                | 19  | 2.0  | 26  | 3.8  | 45   | 2.8  |
| Due to indications in obsolete guides                                           | 26  | 2.8  | 19  | 2.8  | 45   | 2.8  |

### Responsibility for overuse

The responsibility for overuse was assigned to, in order, the patients' relatives, the mass media, the professionals themselves, health pages on the Internet, and defensive medicine practices (Table 3). Male professionals attributed the responsibility for overuse of resources due to pressure by patients more directly on health services senior management ( $F=4.3$ ,  $p=0.038$ ,  $CI\ 95\%=-0.01-0.53$ ). Those solely working in the public health system (as opposed to those who also worked in private practice) held the media ( $F=6.4$ ,  $p=0.011$ ,  $CI\ 95\%=0.20-1.52$ ) and patients' relatives ( $F=4.5$ ,  $p=0.03$ ,  $CI\ 95\%=-0.07-1.06$ ) more directly accountable. No cross-effects from the interaction of these variables were observed.

Table 3. Responsibility for overuse in the opinion of the professionals surveyed.

|                                                       | General Medicine<br>(N = 936) |     | Pediatrics<br>(N = 682) |     | Nursing<br>(N = 286) |     | Total   |     | F     | P-Value |
|-------------------------------------------------------|-------------------------------|-----|-------------------------|-----|----------------------|-----|---------|-----|-------|---------|
|                                                       | Average                       | SD  | Average                 | SD  | Average              | SD  | Average | SD  |       |         |
| Press, radio, and television                          | 7.6                           | 2.5 | 6.8                     | 2.6 | 7.0                  | 2.6 | 7.2     | 2.6 | 21.2  | 0.001   |
| Patients                                              | 7.5                           | 2.1 | 5.0                     | 3.3 | 7.7                  | 2.1 | 6.6     | 2.9 | 194.7 | 0.001   |
| Relatives of patients                                 | 7.5                           | 2.2 | 7.7                     | 2.2 | 7.8                  | 1.9 | 7.6     | 2.2 | 3.6   | 0.027   |
| Nurses/Physicians                                     | 7.0                           | 2.1 | 7.4                     | 2.2 | 6.7                  | 2.4 | 7.1     | 2.2 | 13.2  | 0.001   |
| Managers of Internet health platforms                 | 7.0                           | 2.6 | 6.3                     | 2.6 | 6.8                  | 2.4 | 6.8     | 2.6 | 14.8  | 0.001   |
| As a defensive measure against possible future claims | 6.8                           | 2.3 | 6.4                     | 2.4 | 7.4                  | 2.3 | 6.7     | 2.4 | 18.8  | 0.001   |
| Senior management of health systems                   | 6.5                           | 2.7 | 5.3                     | 3.0 | 6.5                  | 2.8 | 6.1     | 2.9 | 38.5  | 0.001   |

|                                                       |     |     |     |     |     |     |     |     |      |       |
|-------------------------------------------------------|-----|-----|-----|-----|-----|-----|-----|-----|------|-------|
| Patient associations                                  | 6.2 | 2.7 | 5.4 | 2.8 | 5.7 | 2.5 | 5.8 | 2.7 | 15.5 | 0.001 |
| Center directors                                      | 5.4 | 2.8 | 4.4 | 2.9 | 6.0 | 2.8 | 5.1 | 2.9 | 37.1 | 0.001 |
| Directors or<br>Coordinators of<br>nursing/physicians | 4.7 | 2.8 | 4.2 | 2.8 | 5.9 | 2.7 | 4.7 | 2.8 | 39.3 | 0.001 |

Scale from 0 to 10, minimum and maximum responsibility, respectively.

### Pressure by patients and responses from professionals

Only 31 (1.6%) of those surveyed said that they had not received any requests from patients (more frequent among professionals with more than 15 years of experience), while 103 (5.4%) said that they received requests like these from patients every day (normally younger professionals). General practitioners were those who claimed to be under greater pressure to carry out unnecessary tests or procedures ( $\chi^2=88.8$ ,  $p<0.001$ ,  $PD=17.0$ ). However, it was the nurses who admitted to carrying out these types of unnecessary procedures more frequently; pediatrics did so the least ( $\chi^2=175.7$ ,  $p<0.001$ ,  $PD=12.3$ ) (Table 4).

Table 4. Pressure from patients and response by professionals.

|                                        | Patients (or their guardians) request unnecessary tests and procedures from you |      | You order/carry out unnecessary tests or procedures due to pressure from a patient (or guardian) |      | You convince the patient (or guardian) that it is unnecessary and can pose significant risk |      | The patient's response is negative, or even aggressive, when you refuse to carry out a procedure that the patient requests from you |      |                      |  |
|----------------------------------------|---------------------------------------------------------------------------------|------|--------------------------------------------------------------------------------------------------|------|---------------------------------------------------------------------------------------------|------|-------------------------------------------------------------------------------------------------------------------------------------|------|----------------------|--|
|                                        | N                                                                               | %    | N                                                                                                | %    | N                                                                                           | %    | N                                                                                                                                   | %    |                      |  |
| <b>General practitioners (N = 936)</b> |                                                                                 |      |                                                                                                  |      |                                                                                             |      |                                                                                                                                     |      |                      |  |
| Never                                  | 12                                                                              | 1.3  | 118                                                                                              | 12.6 | 55                                                                                          | 5.9  | 237                                                                                                                                 | 25.3 | Never                |  |
| Monthly                                | 192                                                                             | 20.5 | 463                                                                                              | 49.5 | 248                                                                                         | 26.5 | 400                                                                                                                                 | 42.7 | Sometimes            |  |
| Almost every week                      | 396                                                                             | 42.3 | 271                                                                                              | 29.0 | 356                                                                                         | 38.0 | 168                                                                                                                                 | 17.9 | One-half of the time |  |
| Almost every day                       | 260                                                                             | 27.8 | 69                                                                                               | 7.4  | 227                                                                                         | 24.3 | 92                                                                                                                                  | 9.8  | Most of the time     |  |
| Every day                              | 76                                                                              | 8.1  | 15                                                                                               | 1.6  | 50                                                                                          | 5.3  | 39                                                                                                                                  | 4.2  | All the time         |  |
| <b>Pediatricians (N = 682)</b>         |                                                                                 |      |                                                                                                  |      |                                                                                             |      |                                                                                                                                     |      |                      |  |
| Never                                  | 9                                                                               | 1.3  | 188                                                                                              | 27.6 | 14                                                                                          | 2.1  | 231                                                                                                                                 | 33.9 | Never                |  |
| Monthly                                | 228                                                                             | 33.4 | 401                                                                                              | 58.8 | 182                                                                                         | 26.7 | 343                                                                                                                                 | 50.3 | Sometimes            |  |
| Almost every week                      | 316                                                                             | 46.3 | 84                                                                                               | 12.3 | 262                                                                                         | 38.4 | 73                                                                                                                                  | 10.7 | One-half of the time |  |
| Almost every day                       | 113                                                                             | 16.6 | 6                                                                                                | 0.9  | 188                                                                                         | 27.6 | 30                                                                                                                                  | 4.4  | Most of the time     |  |
| Every day                              | 16                                                                              | 2.3  | 3                                                                                                | 0.4  | 36                                                                                          | 5.3  | 5                                                                                                                                   | 0.7  | All the time         |  |
| <b>Nurses (N = 286)</b>                |                                                                                 |      |                                                                                                  |      |                                                                                             |      |                                                                                                                                     |      |                      |  |
| Never                                  | 10                                                                              | 3.5  | 37                                                                                               | 12.9 | 9                                                                                           | 3.1  | 36                                                                                                                                  | 12.6 | Never                |  |
| Monthly                                | 82                                                                              | 28.7 | 123                                                                                              | 43.0 | 106                                                                                         | 37.1 | 158                                                                                                                                 | 55.2 | Sometimes            |  |

|                   |     |      |    |      |     |      |    |      |                      |
|-------------------|-----|------|----|------|-----|------|----|------|----------------------|
| Almost every week | 137 | 47.9 | 87 | 30.4 | 71  | 24.8 | 36 | 12.6 | One-half of the time |
| Almost every day  | 46  | 16.1 | 31 | 10.8 | 92  | 32.2 | 54 | 18.9 | Most of the time     |
| Every day         | 11  | 3.8  | 8  | 2.8  | 8.0 | 2.8  | 2  | 0.7  | All the time         |

The physicians who reported receiving requests from patients for unnecessary tests or procedures more frequently were those who acknowledged either ordering tests (every day or almost every day) for them or carrying out unnecessary procedures themselves for patients ( $\chi^2=419.0$ ,  $p<0.001$ , PD = 16.8). They also stated that the reaction by the patient (or guardian) when a request for tests or procedures was denied was more negative or aggressive ( $\chi^2=247.7$ ,  $p<0.001$ , PD = 20.1).

Male nurses, compared to their female counterparts, reported greater pressure from patients to carry out unnecessary procedures ( $\chi^2=14.8$ ,  $p=0.005$ , PD=12.7) and, compared with the females, carried out these unnecessary procedures more frequently ( $\chi^2=14.1$ ,  $p=0.007$ , PD=10.2). The ability to dissuade patient requests was similar in men and women in all three professional profiles. However, male nurses, compared to those female, reported receiving an aggressive response more frequently ( $\chi^2=13.6$ ,  $p=0.009$ , PD=11.1).

Pediatricians with less than 5 years of experience reported receiving requests for unnecessary tests or procedures most frequently ( $\chi^2=52.6$ ,  $p<0.001$ , PD=21.3). Pediatricians who had practiced fewer years stated that when refusing a patient's request, the patient's reaction was frequently more negative or even aggressive in comparison to their more experienced colleagues ( $\chi^2=68.4$ ,  $p<0.001$ , PD=6.5).

### What patients request

The most frequent requests from patients were for routine analytical examinations, referrals to specialists, antimicrobial treatments, radiological studies, and requests for healing materials without indication (Table 5). The profile of the patient who requested unnecessary nursing procedures the most corresponded to that of a woman (145, 50.7%) over 66 years of age (158, 55.2%) who suffered various chronic conditions (154, 53.8%). In the case of general practitioners, these were usually women (604, 64.5%) between 51 and 65 years of age (411, 43.9%) with a low prevalence pathology (296, 31.6%) or one that was unspecified (219, 23.4%) and who consulted the Internet about their concerns (172, 18.4%). In pediatrics, the profile of the guardian who most persistently requested unnecessary tests or procedures corresponded to the mother of a patient (480, 70.4%) who suffered an unspecified pathology (367, 53.8%) and who usually sought information on health webpages (130, 19.1%).

Table 5. Unnecessary tests and procedures patients usually request.

| General practitioners (N = 936)                                       | N   | %    | Pediatricians (N = 682)                                                     | N   | %    | Nurses (N = 286)                                                | N   | %    |
|-----------------------------------------------------------------------|-----|------|-----------------------------------------------------------------------------|-----|------|-----------------------------------------------------------------|-----|------|
| Routine checkup analysis                                              | 709 | 75.7 | Routine checkup analysis                                                    | 510 | 74.8 | Taking vital signs                                              | 225 | 78.7 |
| Referrals to specialists without any concerning features <sup>§</sup> | 628 | 67.1 | Administration of antibiotics when is not recommended <sup>§</sup>          | 491 | 72.0 | Administration of treatment that does not require professionals | 175 | 61.2 |
| Radiological studies without any concerning features <sup>§</sup>     | 570 | 60.9 | Referrals to other specialists without any concerning features <sup>§</sup> | 450 | 66.0 | Delivery of healing materials without indication                | 84  | 29.4 |

|                                                                    |     |      |                                                                   |     |      |                                                                                         |    |      |
|--------------------------------------------------------------------|-----|------|-------------------------------------------------------------------|-----|------|-----------------------------------------------------------------------------------------|----|------|
| Magnetic Resonance without any concerning features <sup>§</sup>    | 380 | 40.6 | Radiological studies without any concerning features <sup>§</sup> | 197 | 28.9 | Delivery of glucometer without the patient having started hypoglycemia treatment        | 72 | 25.2 |
| PSA* in asymptomatic patients                                      | 358 | 38.2 |                                                                   |     |      | Administer vaccinations outside the vaccine calendar without indication by pediatrician | 34 | 11.9 |
| Administration of antibiotics when is not recommended <sup>§</sup> | 348 | 37.2 |                                                                   |     |      |                                                                                         |    |      |
| Computed Tomography when is not recommended <sup>§</sup>           | 280 | 29.9 |                                                                   |     |      |                                                                                         |    |      |

\*PSA - prostate-specific antigen

<sup>§</sup>following Do not DO Recommendations from Grupo de trabajo de la SEMFyC para el proyecto Recomendaciones «NO HACER». Recomendaciones NO HACER. Barcelona: SEMFyC ediciones, 2014, and Asociación Española de Pediatría (AEP). Recomendaciones de “no hacer” en Pediatría. 2014 [consultado 24-06-2017]: Available in: <http://www.aeped.es/documentos/recomendaciones-no-hacer-en-pediatria>

### Ideas that work to dissuade the patient

According to the majority of those surveyed, the arguments that worked best for dissuading the patient or guardian that the request was inadequate were clinical reasons and for patient safety (Table 6). The safety of ( $\chi^2=31.7$ ,  $p<0.001$ ,  $PD=8.5$ ) and avoiding discomfort in the child ( $\chi^2=57.7$ ,  $p<0.001$ ,  $PD=10.0$ ) were considered more effective arguments, above all for pediatricians. Cost savings was the least effective argument for pediatricians ( $\chi^2=43.9$ ,  $p<0.001$ ,  $PD=6.9$ ), while avoiding patient discomfort was least effective for general practitioners ( $\chi^2=57.7$ ,  $p<0.001$ ). For more experienced pediatricians ( $\chi^2=30.6$ ,  $p=0.002$ ,  $PD=17.0$ ) and nurses ( $\chi^2=23.6$ ,  $p=0.023$ ,  $PD=28.8$ ), arguing clinical reasons to dissuade the patient or guardian's request worked better.

Table 6. Degree of effectiveness as reported by the professionals about the arguments for convincing the patient that the treatment or procedure is unnecessary.

| Argument                                                           | General practitioners<br>N = 936 |      | Pediatricians<br>N = 682 |      | Nurses<br>N = 286 |      | Total<br>N = 1904 |      | Chi <sup>2</sup> | P-Value= |
|--------------------------------------------------------------------|----------------------------------|------|--------------------------|------|-------------------|------|-------------------|------|------------------|----------|
|                                                                    | N                                | %    | N                        | %    | N                 | %    | N                 | %    |                  |          |
| Patient safety                                                     | 361                              | 38.6 | 311                      | 45.6 | 106               | 37.1 | 778               | 40.9 | 23.9             | 0.000    |
| Clinical reasons based on knowledge                                | 352                              | 37.6 | 297                      | 43.5 | 102               | 35.7 | 751               | 39.4 | 9.8              | 0.043    |
| The result is achieved by other procedures                         | 320                              | 34.2 | 254                      | 37.2 | 91                | 31.8 | 665               | 34.9 | 8.2              | 0.085    |
| Saves patient discomfort                                           | 119                              | 12.7 | 144                      | 21.1 | 65                | 22.7 | 328               | 17.2 | 44.7             | 0.000    |
| Saves time and money that have a positive effect on other patients | 68                               | 7.3  | 29                       | 4.3  | 32                | 11.2 | 129               | 6.8  | 32.3             | 0.000    |

High and Very High degrees of effectiveness shown

Pediatricians were more successful than general practitioners and nurses at dissuading their patient that the requested test or procedure was unnecessary or that it posed unnecessary risk ( $\chi^2=45.0$ ,  $p<0.001$ ,  $PD=5.4$ ). Nurses reported more frequently that the patient's reaction to a request being refused due to being unnecessary was either negative or aggressive ( $\chi^2=129.5$ ,  $p<0.001$ ,  $PD=14.4$ ). Men and women from all three professional profiles expressed a similar ability for dissuading a patient's request. Less experienced pediatricians stated they were able to dissuade patients more frequently than other pediatricians ( $\chi^2=23.9$ ,  $p=0.021$ ,  $PD=12.4$ ).

Patients who requested healing materials to take home (24/48,  $\chi^2=15.2$ ,  $p=0.004$ ,  $PD=14.4$ ), vaccinations outside the vaccine calendar (11/34,  $\chi^2=10.1$ ,  $p=0.039$ ,  $PD=14.5$ ), and antibiotic treatments (31/491,  $\chi^2=33.4$ ,  $p<0.001$ ,  $PD=4.2$ ) were those who, in the opinion of the professionals surveyed, were least willing to accept explanations and refusals by the professionals for their request.

According to 1231 (64.7%) of those surveyed, an educational campaign directed at the population would help reduce the number of requests for unnecessary tests and procedures by patients. Such a campaign was seen as most useful by general practitioners (general practitioners, 8.0, SD 2.1, CI 95% 7.9-8.0; pediatricians, 7.7, SD 2.0, CI 95% 7.6-7.9; nurses, 7.7, SD 2.0; CI 95% 7.6-7.8).

## DISCUSSION

The results of this study confirm the role that patients' requests and defensive medicine play in overuse. In this study, health professionals reported greater pressure from female patients and patients who suffer an unspecified or yet-undiagnosed pathology. For the former group, and in order to interpret this result, it needs to be taken into consideration that in many European countries females frequently accompany the patient in the consultation (adult or minor).[31] As for the latter case, one needs to consider that in addition to the fears the very patient experiences due to the uncertainty of not knowing what is happening to him/her, there is added pressure from family members, the effect from consulting health news on the Internet, and news from the printed and digital media about medical advances and new techniques.

In this case, it has been proven that overuse also has roots in the insecurity that an ill-defined pathology instills within the professional, the fear of an uncertain outcome for the indicated treatment, as well as the potential effects from a subsequent complaint by the patient or a lawsuit filed in a court of law. If we take into account the lack of a diagnosis, and then to it add on the lack of time in consultation and the need for greater security for the very professional, we find another of the main causes of overuse.[31] Curiously enough, these results show that as requests from patients become more insistent, for example vaccinating a minor outside the vaccine calendar, an antibiotic when it is contraindicated, or giving healing materials to the patient so he/she can take them home, the response from these patients is more negative. Both of these results could support the opinions of those surveyed about the usefulness of carrying out an educational campaign among the population [32] and the measures that have been adopted to prevent aggression towards professionals.

Previous research had found that, when compared to other specialties, general practitioners were under greater pressure by their patients for unnecessary medical tests or procedures to be carried out on them.[33] The fact that patients in primary care exert greater pressure than in hospitals is observed in both organizational models of payment for medical acts as well as in

1  
2  
3 systems where the physician is the gatekeeper.[27, 33-34] These results should be interpreted  
4 keeping in mind the assessment that patients give about both care levels in every country and  
5 the belief that super specialization might be a key to quality medicine.

6  
7 The frequency of requests for medical tests or procedures in the study by Zambrana & Lozano  
8 [35] in Spanish hospitals exceeded the frequency of requests that physicians in American  
9 hospitals reported by 16 percentage points. In this study in primary care, the frequency that  
10 general practitioners said they receive requests from their patients was 38 percentage points  
11 higher than what American physicians reported (78% versus 40%). The tendency in published  
12 figures of overuse from organizational models of primary care similar to that of the Spanish  
13 model [27] point in a similar direction, and suggests the gatekeepers need rather support to  
14 prevent (or at least reduce) overuse. Moreover, this debate remains open because other  
15 studies conducted in the USA [34] indicate that overuse in the wake of patient requests is  
16 similar at health centers in both wealthy areas and others with lower income levels.

17  
18 This study's findings reveal that as perceived pressure from patients becomes more insistent,  
19 the professionals either order or carry out a greater number of unnecessary test and  
20 procedures, extending the initial observations that general practitioners tend to accept  
21 requests from their patients more so than other specialists [34]. General practitioners perceive  
22 more pressure from their patients than pediatricians or nurses, although the latter are those  
23 who carry out unnecessary procedures more frequently, probably because this group  
24 acknowledges being on the receiving end of more aggressive responses from patients when  
25 turning down requests. Nevertheless, these results should be qualified based on the request  
26 the patient makes and by the dissemination of practice guides between professionals. It is  
27 unlikely that ordering a test such as the prostate-specific antigen test (PSA) in an  
28 asymptomatic male who insists so he can "rest easy" is the same as initiating a totally  
29 contraindicated treatment and one that poses immediate risks for the patient. Most physicians  
30 accept the first situation more easily,[36] but resist the second.[23, 31]

31  
32 Although professionals are directly responsible for overuse, and this and other research  
33 recognize this as such,[27, 33] we must also consider the role that patient associations,  
34 accreditation systems of websites, and associations of health news informers could play to  
35 succeed, among everybody, in reducing overuse figures. Ignorance on behalf of the population  
36 has been analyzed in other research, especially that regarding the use of therapies and  
37 requests for diagnostic imaging tests irrespective of the risk from the ionizing radiation  
38 involved.[37]

39  
40 Information does not always contribute to fulfill these recommendations.[26] However,  
41 providing the patient with clear and direct information about the clinical and safety reasons  
42 that advise against carrying out certain tests or starting certain treatments contributes to  
43 reducing overuse.[38-39] These results follow this line and confirm findings from research  
44 conducted in other countries where primary care physicians draw on evidence to dissuade a  
45 patient's request for a certain diagnostic test when they deem it unnecessary.[23] The other  
46 argument that has also demonstrated its usefulness for dissuading the patient is safety, above  
47 all for pediatricians. Considering the Spanish study with hospital physicians,[35] the  
48 effectiveness of general practitioners and pediatricians in dissuading patients is similar to that  
49 of their colleagues at hospitals. The pediatricians in this study did not report a dissuasive  
50 capacity any different from that of their colleagues who care for adults.

51  
52 The professionals who fail to dissuade patients from their requests feel as if they are under  
53 greater pressure, they end up carrying out more unnecessary tests and procedures, and they  
54 also perceive more aggressive responses from their patients when refusing to carry out any of  
55 their requests. Although we do know that the lack of time in consultation has a negative effect  
56 on clinical safety,[32] these data do not permit us to determine whether the ability to dissuade  
57  
58  
59

1  
2  
3 patients from their requests might be different if more time were dedicated per patient. For a  
4 significant portion of physicians, and for those surveyed in this study as well, maintaining a  
5 positive relationship with the patient was essential,[25, 27] probably because it is one of the  
6 basic therapeutic resources in primary care.[40] Not responding to a request or not knowing  
7 how to dissuade the patient muddies the relationship. Furthermore, when the patient  
8 questions the physician's clinical expertise, their relationship worsens and defensive medicine  
9 tends to increase.[4, 8]

10  
11 The frequency of overuse resulting from movements grouped together under the "Less is  
12 More Medicine" label [41] has begun to be studied systematically, and various campaigns have  
13 been launched to raise awareness in professionals about what must not be done,[42-44] but  
14 studies analyzing the roles of patients and professionals in overuse and the impact from  
15 campaigns to reduce overuse directed at the population are still scarce. Furthermore,  
16 campaigns for reducing overuse in the style of Choosing Wisely [44] confirm the need to  
17 influence health education, but also directed especially at drawing attention to the risks from  
18 interpreting health websites without the appropriate information, like, for example,  
19 considering their latest update, sources of information, and the commitment to the quality of  
20 their contents,[45] and reducing the negative impact that these sources of information are  
21 beginning to have on the relationship between patients and professionals.[14, 46] This is also  
22 true in the case of publicly financed health systems, to carry out campaigns to fortify solidarity  
23 behavior and properly use diagnostic and therapeutic resources.

### 24 25 **Practical implications**

26 These results have direct implications on the professional level. First, fostering training in  
27 communication skills, highlighting how to approach communication with a patient who applies  
28 pressure to receive an unnecessary and/or harmful test or treatment for him or herself. For  
29 example, by promoting the so-called web prescription by recommending safe sites to patients  
30 where they can become informed, an aspect in which Spain lags somewhat behind.[46]  
31 Second, establishing a framework of greater legal security for professionals who act in  
32 accordance with practice guides. Third, identifying if Do not Do has a higher chance to produce  
33 an adverse event to define it as a target in a public campaign to reduce patients requests.

34  
35 On the health organization level, these results reinforce the need to establish the  
36 implementation in primary care of up-to-date practice guides and to establish alerts and  
37 assistance algorithms (including safety arguments for patients) on the ordering of tests,  
38 referrals, and prescriptions for limiting overuse. The lessons learned using decision aids to  
39 reduce more aggressive choices could be applied to design these algorithms.[47] Management  
40 indicators and annual or biennial targets could include indicators related to overuse, especially  
41 in those cases where, furthermore, the risk to patient safety increases.

### 42 43 **Generalizability**

44 These results and recommendations could be applied to the healthcare systems where the  
45 general practitioners (or pediatricians in the case of children) are the gatekeeper.

### 46 47 **Limitations**

48 This study was based on a non-random selection of participants. This sample included  
49 approximately 3% of the general practitioners, 11% of the pediatricians, and 1% of the nurses  
50 in terms of the total of healthcare professionals in Spanish primary care in 2016. Studies using  
51 email and electronic questionnaires are frequent; however, some professionals might have  
52 considered that these systems would not guarantee their privacy and so decided not to  
53 answer. The willingness to respond could bias the sample selection, and in some other cases  
54 physicians or nurses might not admit to overuse. Although the public sector is  
55 overrepresented, this overrepresentation is also observed in the reference population. The  
56  
57  
58  
59



1  
2  
3 limited number of males who answered in the cases of pediatrics and nursing limits the  
4 strengths of the comparisons, even though their number is proportional to that of their  
5 presence within these professional groups. The data correspond to a health model funded by  
6 taxes. Although the questionnaire was used in a previously study,[12] it has not been  
7 previously validated. This quantitative approach should be complemented with qualitative  
8 studies exploring experiences and coping styles to avoid overuse.

### 9 10 **Outlook**

11 Overuse is a challenge for health systems, particularly those where the general practitioner is  
12 the system gatekeeper, and it requires responses from both the clinical as well as economic  
13 points of view.  
14

### 15 16 **CONTRIBUTORS**

17 JJM and JMA-A conceived and designed the study. CS, PP-P, CN, OG, and JG acquired the data  
18 for the work. IC prepared the data, and together with JJM and JMA-A, conducted statistical  
19 analysis. All interpreted data for the work. JJM and IC prepared a first draft of the manuscript.  
20 All authors revised the paper critically for important intellectual content and approved the  
21 final version.  
22

### 23 24 25 **FUNDING**

26 This study was made possible by a grant from the European Regional Development Fund  
27 (ERDF) call for Health Research, reference PI16/00816.  
28

### 29 30 31 **COMPETING INTERESTS**

32 None.  
33

### 34 35 **DATA SHARING STATEMENT**

36 No additional data available.  
37

### 38 39 40 **ACKNOWLEDGEMENTS**

41 Involvement in the study by the health services and related organizations and institutions were  
42 indispensable for carrying out this study. We are grateful to the health services of Andalucía,  
43 Aragón, Madrid, Navarra, and Comunidad Valenciana, the Spanish Association of Primary Care  
44 Pediatrics (AEPap), Spanish Society of Outpatient and Primary Care Pediatrics (SEPEAP),  
45 Illustrious Official College of Physicians of Valencia, Council of Nursing of the Valencian  
46 Community (CECOVA), and the Spanish Society of General and Family Practitioners (SEMG).  
47

### 48 49 50 **REFERENCES**

51 1 Lainer M, Vögele A, Wensing M, et al. Improving medication safety in primary care.  
52 A review and consensus procedure by the LINNEAUS collaboration on patient safety in primary  
53 care. *Eur J Gen Pract* 2015;21 Suppl:14–8.

54 2 Hatoun J, Chan JA, Yaksic E, et al. A Systematic Review of Patient Safety Measures in  
55 Adult Primary Care. *Am J Med Qual* 2017;32:237–45.  
56  
57  
58

- 1
- 2
- 3 Glasziou P, Straus S, Brownlee S, et al. Evidence for underuse of effective medical services  
4 around the world. *Lancet* 2017 8;390:169–77.
- 5
- 6 Morgan DJ, Wright SM, Dhruva S. Update on Medical Overuse. *JAMA Intern Med*  
7 2015;175:120–4.
- 8
- 9 Chassin MR, Galvin RW. The urgent need to improve health care quality. Institute of  
10 Medicine National Roundtable on Health Care Quality. *JAMA* 1998;280:1000–05.
- 11
- 12 Brownlee S, Chalkidou K, Doust J, et al. Evidence for overuse of medical services around the  
13 world. *Lancet* 2017;390:156–68.
- 14
- 15 Schoen C, Osborn R, Squires D, et al. A Survey Of Primary Care Doctors In Ten Countries  
16 Shows Progress In Use Of Health Information Technology, Less In Other Areas. *Health Aff*  
17 *(Millwood)* 2012; 31:2805–16.
- 18
- 19 Panella M, Leigh F, Rinaldi C, et al. Defensive Medicine: Defensive Medicine: Overview of  
20 the literature. *Ig Sanita Pubbl* 2015;71:335–51.
- 21
- 22 Selby K, Cornuz J, Cohidon C, et al. How do Swiss general practitioners agree with and report  
23 adhering to a top-five list of unnecessary tests and treatments? Results of a cross-sectional  
24 survey. *Eur J Gen Pract* 2017;1–7. doi: 10.1080/13814788.2017.1395018
- 25
- 26 Sirovich BE, Woloshin S, Schwartz LM. Too little? Too much? Primary care physicians' views  
27 on US health care: a brief report. *Arch Intern Med* 2011;171:1582–5.
- 28
- 29 PerryUndem Research/Communication. Unnecessary Tests and Procedures In the Health  
30 Care System: What Physicians Say About The Problem, the Causes, and the Solutions: Results  
31 from a National Survey of Physicians. ABIM Foundation; 2014 May.
- 32
- 33 Cummins RO. Clinicians' reasons for overuse of skull radiographs. *AJR Am Roentgenol*  
34 1980;135:549–52.
- 35
- 36 Tilburt JC, Wynia MK, Sheeler RD, et al. Views of US physicians about controlling health care  
37 costs. *JAMA* 2013;310:380–8.
- 38
- 39 Mira JJ, Guilabert M, Pérez-Jover V, et al. Barriers for an effective communication around  
40 clinical decision making: an analysis of the gaps between doctors' and patients' point of view.  
41 *Health Expect* 2014;17:826–39.
- 42
- 43 Buist DSM. Primary Care Clinicians' Perspectives on Reducing Low-Value Care in an  
44 Integrated Delivery System. *Perm J* 2016;20:41–6.
- 45
- 46 Freudenberg LS, Beyer T. Subjective perception of radiation risk. *J Nucl Med* 2011;52 Suppl  
47 2:29S–35S.
- 48
- 49 Kruger JF, Chen AH, Rybkin A, et al. Clinician perspectives on considering radiation exposure  
50 to patients when ordering imaging tests: a qualitative study. *BMJ Qual Saf* 2014;23:893–901.
- 51
- 52 Diaz, JA, Griffith RA, Ng JJ, et al. Patients' Use of the Internet for Medical Information. *J Gen*  
53 *Intern Med* 2002;17:180–5.
- 54
- 55 Mira JJ, Llinás G, Lorenzo S, et al. Uso de Internet por médicos de primaria y hospitales y  
56 percepción de cómo influye en su relación con los pacientes. *Aten Primaria* 2009;41:308–14.
- 57
- 58 Silverstein W, Lass E, Born K, et al. A survey of primary care patients' readiness to engage in  
59 the de-adoption practices recommended by Choosing Wisely Canada. *BMC Res Notes*  
60 2016;9:301.
- 61
- 62 Cohen O, Kahan E, Zalewski S, et al. Medical investigations requested by patients: how do  
63 primary care physicians react? *Fam Med* 1999;31:426–31.

- 1  
2  
3 22 Yagil D, Medler-Liraz H. Clinical Expert or Service Provider? Physicians' Identity Work in the  
4 Context of Counterprofessional Patient Requests. *Qual Health Res* 2015;25:1199–211.
- 5 23 Fenton JJ, Franks P, Feldman MD, et al. Impact of patient requests on provider-perceived  
6 visit difficulty in primary care. *J Gen Intern Med* 2015;30:214–20.
- 7  
8 24 Sabbatini AK, Tilburt JC, Campbell EG, et al. Controlling Health Costs: Physician Responses to  
9 Patient Expectations for Medical Care. *J Gen Intern Med* 2014;29:1234–41. doi:  
10 10.1007/s11606-014-2898-6
- 11 25 Alber K, Kuehlein T, Schedlbauer A, et al. Medical overuse and quaternary prevention in  
12 primary care - A qualitative study with general practitioners. *BMC Fam Pract* 2017;18:99. doi:  
13 10.1186/s12875-017-0667-4.
- 14  
15 26 Zikmund-Fisher BJ, Kullgren JT, Fagerlin A, et al. Perceived Barriers to Implementing  
16 Individual Choosing Wisely® Recommendations in Two National Surveys of Primary Care  
17 Providers. *J Gen Intern Med* 2017;32:210–7.
- 18  
19 27 Wammes JJ, Jeurissen PP, Verhoef LM, et al. Is the role as gatekeeper still feasible? A survey  
20 among Dutch general practitioners. *Fam Pract* 2014;31:538–44.
- 21  
22 28 Ministerio de Sanidad. La salud y el sistema sanitario en 100 tablas. Available from:  
23 <https://www.msssi.gob.es/estadEstudios/estadisticas/sisInfSanSNS/tablasEstadisticas/SaludSis>  
24 [temaSanitario\\_100\\_Tablas1.pdf](https://www.msssi.gob.es/estadEstudios/estadisticas/sisInfSanSNS/tablasEstadisticas/SaludSis) (accessed 26 Jun 2017).
- 25  
26 29 Domínguez-Aurrecochea B, Valdivia-Jiménez C. Radiografía de la Pediatría de Atención  
27 Primaria española: nuestro espacio en el Sistema Nacional de Salud. *Rev Pediatr Aten Primaria*  
28 2011;13:59–70.
- 29  
30 30 Ministerio de Sanidad, Servicios Sociales e Igualdad. SIAP - Estadísticas de Población,  
31 Recursos y Actividad. Aplicación interactiva, año 2016 [Internet]. Available  
32 from: <http://pestadistico.inteligenciadegestion.msssi.es/publicoSNS/comun/Cubo.aspx?IdNodo=6407#no-back-button> (accessed 31 Jul 2017).
- 33  
34 31 Moro ML, Marchi M, Gagliotti C, et al. Why do paediatricians prescribe antibiotics? Results  
35 of an Italian regional project. *BMC Pediatr* 2009;9:69.
- 36  
37 32 Mira JJ, Nebot C, Lorenzo S, et al. Patient report on information given, consultation time  
38 and safety in primary care. *Qual Saf Health Care* 2010;19:e33.
- 39  
40 33 Colla CH, Kinsella EA, Morden NE, et al. Physician Perceptions of Choosing Wisely and  
41 Drivers of Overuse. *Am J Manag Care* 2016;22:337–43.
- 42  
43 34 Kaul S, Kirchhoff AC, Morden NE, et al. Physician Response to Patient Request for  
44 Unnecessary Care. *Am J Manag Care* 2015;21:823–32.
- 45  
46 35 Zambrana-García JL, Lozano Rodríguez-Mancheño A. Actitudes de los médicos hacia el  
47 problema de las pruebas y los procedimientos innecesarios. *Gac Sanit* 2016;30:485–6.
- 48  
49 36 Jessen K, Søndergaard J, Larsen PV, et al. Danish General Practitioners' Use of Prostate-  
50 Specific Antigen in Opportunistic Screening for Prostate Cancer: A Survey Comprising 174 GPs.  
51 *Inter J Family Med* 2013;540707. <http://dx.doi.org/10.1155/2013/540707> (accessed 24 Jun  
52 2017).
- 53  
54 37 Griffith J, Monkman H, Borycki E, et al. Physician Experiences with Perceived Pressure to  
55 Order Diagnostic Imaging Services. *Stud Health Technol Inform* 2015;218:40591.
- 56  
57 38 Schoenthaler A, Albright G, Hibbard J, et al. Simulated Conversations With Virtual Humans  
58 to Improve Patient-Provider Communication and Reduce Unnecessary Prescriptions for  
59 Antibiotics: A Repeated Measure Pilot Study. *JMIR Med Educ* 2017;3:e7.
- 60

1  
2  
3 39 Légaré F, Labrecque M, Cauchon M, et al. Training family physicians in shared decision-  
4 making to reduce the overuse of antibiotics in acute respiratory infections: a cluster  
5 randomized trial. *CMAJ* 2012;184:E726–34.

6 40 Mira JJ, Martínez-Jimeno L, Orozco-Beltrán D, et al. What older complex chronic patients  
7 need to know about their everyday medication for safe drug use. *Expert Opin Drug Saf*  
8 2014;13:713–21.

9  
10 41 Rosenberg A, Agiro A, Gottlieb M, et al. Early Trends Among Seven Recommendations From  
11 the Choosing Wisely Campaign. *JAMA Intern Med* 2015;175:1913–20.

12 42 Combs B, Caverly T. The Do No Harm Project. 2014; School of Medicine, Internal Medicine  
13 Residency Training Program, University of Colorado .Available  
14 from: [https://lowinstitute.org/wp-content/uploads/2014/05/The-Do-No-Harm-Project-Intro-](https://lowinstitute.org/wp-content/uploads/2014/05/The-Do-No-Harm-Project-Intro-Slides.pdf)  
15 [Slides.pdf](https://lowinstitute.org/wp-content/uploads/2014/05/The-Do-No-Harm-Project-Intro-Slides.pdf) (accessed 9 Jun 2017).

16  
17 43 Bonaldi A, Vernerio S. Italy's Slow Medicine: a new paradigm in medicine. *Recenti Prog Med*  
18 2015;106:85–91.

19  
20 44 ABIM Foundation. Choosing Wisely [Internet]. Available from:  
21 <http://www.choosingwisely.org/> (accessed 24 Jun 2017).

22 45 Mira JJ, Llinás G, Pérez-Jover V. Habits of Internet users and usefulness of websites in  
23 Spanish for health education. *World Hosp Health Serv*. 2008;44:30–5.

24  
25 46 Lorenzo S, Mira JJ. Are Spanish physicians ready to take advantage of the Internet? *World*  
26 *Hosp Health Serv* 2004;40:31–5.

27 47 Stacey D, Légaré F, Col NF, et al. Decision aids for people facing health treatment or  
28 screening decisions. *Cochrane Database Syst Rev* 2017;4:CD001431. doi:  
29 10.1002/14651858.CD001431.pub5  
30  
31  
32  
33  
34  
35  
36  
37  
38  
39  
40  
41  
42  
43  
44  
45  
46  
47  
48  
49  
50  
51  
52  
53  
54  
55  
56  
57  
58  
59  
60

**STROBE 2007 (v4) Statement—Checklist of items that should be included in reports of *cross-sectional studies***

| Section/Topic                | Item # | Recommendation                                                                                                                                                                       | Reported on page # |
|------------------------------|--------|--------------------------------------------------------------------------------------------------------------------------------------------------------------------------------------|--------------------|
| Title and abstract           | 1      | (a) Indicate the study's design with a commonly used term in the title or the abstract                                                                                               | 1                  |
|                              |        | (b) Provide in the abstract an informative and balanced summary of what was done and what was found                                                                                  | 1                  |
| <b>Introduction</b>          |        |                                                                                                                                                                                      |                    |
| Background/rationale         | 2      | Explain the scientific background and rationale for the investigation being reported                                                                                                 | 3                  |
| Objectives                   | 3      | State specific objectives, including any prespecified hypotheses                                                                                                                     | 3                  |
| <b>Methods</b>               |        |                                                                                                                                                                                      |                    |
| Study design                 | 4      | Present key elements of study design early in the paper                                                                                                                              | 3-4                |
| Setting                      | 5      | Describe the setting, locations, and relevant dates, including periods of recruitment, exposure, follow-up, and data collection                                                      | 3-4                |
| Participants                 | 6      | (a) Give the eligibility criteria, and the sources and methods of selection of participants                                                                                          | 3-4                |
| Variables                    | 7      | Clearly define all outcomes, exposures, predictors, potential confounders, and effect modifiers. Give diagnostic criteria, if applicable                                             | 4                  |
| Data sources/<br>measurement | 8*     | For each variable of interest, give sources of data and details of methods of assessment (measurement). Describe comparability of assessment methods if there is more than one group | 4                  |
| Bias                         | 9      | Describe any efforts to address potential sources of bias                                                                                                                            | 4                  |
| Study size                   | 10     | Explain how the study size was arrived at                                                                                                                                            | 4                  |
| Quantitative variables       | 11     | Explain how quantitative variables were handled in the analyses. If applicable, describe which groupings were chosen and why                                                         | 4                  |
| Statistical methods          | 12     | (a) Describe all statistical methods, including those used to control for confounding                                                                                                | 4                  |
|                              |        | (b) Describe any methods used to examine subgroups and interactions                                                                                                                  | 4                  |
|                              |        | (c) Explain how missing data were addressed                                                                                                                                          | 4                  |
|                              |        | (d) If applicable, describe analytical methods taking account of sampling strategy                                                                                                   | --                 |
|                              |        | (e) Describe any sensitivity analyses                                                                                                                                                | --                 |
| <b>Results</b>               |        |                                                                                                                                                                                      |                    |

|                          |     |                                                                                                                                                                                                              |         |
|--------------------------|-----|--------------------------------------------------------------------------------------------------------------------------------------------------------------------------------------------------------------|---------|
| Participants             | 13* | (a) Report numbers of individuals at each stage of study—eg numbers potentially eligible, examined for eligibility, confirmed eligible, included in the study, completing follow-up, and analysed            | 4-5     |
|                          |     | (b) Give reasons for non-participation at each stage                                                                                                                                                         | 4-5     |
|                          |     | (c) Consider use of a flow diagram                                                                                                                                                                           | --      |
| Descriptive data         | 14* | (a) Give characteristics of study participants (eg demographic, clinical, social) and information on exposures and potential confounders                                                                     | TABLE 1 |
|                          |     | (b) Indicate number of participants with missing data for each variable of interest                                                                                                                          | 12-16   |
| Outcome data             | 15* | Report numbers of outcome events or summary measures                                                                                                                                                         | 5-6     |
| Main results             | 16  | (a) Give unadjusted estimates and, if applicable, confounder-adjusted estimates and their precision (eg, 95% confidence interval). Make clear which confounders were adjusted for and why they were included | 5-6     |
|                          |     | (b) Report category boundaries when continuous variables were categorized                                                                                                                                    | 5-6     |
|                          |     | (c) If relevant, consider translating estimates of relative risk into absolute risk for a meaningful time period                                                                                             | --      |
| Other analyses           | 17  | Report other analyses done—eg analyses of subgroups and interactions, and sensitivity analyses                                                                                                               | --      |
| <b>Discussion</b>        |     |                                                                                                                                                                                                              |         |
| Key results              | 18  | Summarise key results with reference to study objectives                                                                                                                                                     | 7       |
| Limitations              | 19  | Discuss limitations of the study, taking into account sources of potential bias or imprecision. Discuss both direction and magnitude of any potential bias                                                   | 8       |
| Interpretation           | 20  | Give a cautious overall interpretation of results considering objectives, limitations, multiplicity of analyses, results from similar studies, and other relevant evidence                                   | 7-8     |
| Generalisability         | 21  | Discuss the generalisability (external validity) of the study results                                                                                                                                        | 9       |
| <b>Other information</b> |     |                                                                                                                                                                                                              |         |
| Funding                  | 22  | Give the source of funding and the role of the funders for the present study and, if applicable, for the original study on which the present article is based                                                | 10      |

\*Give information separately for cases and controls in case-control studies and, if applicable, for exposed and unexposed groups in cohort and cross-sectional studies.

**Note:** An Explanation and Elaboration article discusses each checklist item and gives methodological background and published examples of transparent reporting. The STROBE checklist is best used in conjunction with this article (freely available on the Web sites of PLoS Medicine at <http://www.plosmedicine.org/>, Annals of Internal Medicine at <http://www.annals.org/>, and Epidemiology at <http://www.epidem.com/>). Information on the STROBE Initiative is available at [www.strobe-statement.org](http://www.strobe-statement.org).
